# Supplementary material for: The Exeter Activity Unlimited statement on physical activity and exercise for cystic fibrosis: methodology and results of an international, multidisciplinary, evidence-driven expert consensus
Source: PubMed Central journal article supplement — Chron Respir Dis. 2022 Sep 6;19:14799731221121670. doi: 10.1177/14799731221121670 (PMC9459449; doi:10.1177/14799731221121670), 2022-09-06
Supplement: sj-pdf-2-crd-10.1177_14799731221121670.pdf [file sj-pdf-2-crd-10.1177_14799731221121670.pdf]

# **1 Rationale for Activity & Exercise**

## **1.1 Patient Oriented Outcomes**

Exercise capacity can predict morbidity and mortality in CF, independent of lung function. Specifically, people with CF that exhibited a higher  $\dot{V}O_{2peak}$  had a longer life expectancy, whereas a greater severity of disease and mortality was associated with those with a lower exercise capacity<sup>1</sup>. Accordingly, over the past 3 decades, exercise has been recommended in CF. In addition to the improvements in exercise capacity, people with CF can experience many other benefits of engaging in exercise/physical activity. There is substantial data to demonstrate that both children and adults with CF who are physically active report having a better quality of life compared to those patients who are inactive. Higher health related quality of life is significantly related to both reported physical activity<sup>2</sup> and daily accelerometer counts<sup>3</sup>. For example, patients have reported higher scores in quality of life when engaging in >30min of moderate-vigorous physical activity<sup>4</sup> or at least 90 minutes of moderate to strenuous exercise per week<sup>5</sup>.

Due to the positive relationships between physical activity and quality of life, as little as 4 exercise counseling sessions in children with CF demonstrated a noticeable increase in the physical well-being dimension<sup>6</sup>. Also exercise, in children hospitalized for an acute exacerbation, was able to improve quality of well-being 1 month after discharge compared to those children who did not exercise during hospitalization<sup>7</sup>. When compared to no training, 12 weeks of anaerobic training, 30-45 minutes per day, 2 days a week was shown to improve the physical functioning domain of the cystic fibrosis questionnaire revised (CFQ-R) in children with CF<sup>8</sup>. However, aerobic training appears to be more beneficial at improving quality of life in children with CF, compared with resistance training alone<sup>9</sup>. Interestingly, both video game training<sup>10</sup> 30-60 minutes per day, 5 days

per week for 6 weeks and yoga therapy<sup>11</sup>, twice per week for 8 weeks can improve the respiratory domain of the CFQ-R in people with CF. Additionally, supervised exercise conditioning for 3 months was able to improve subjective health perception and the improvements were still maintained at the 2 year follow-up<sup>12</sup>. Consistent with this, 3 years of home exercise was able to maintain quality of life in patients with CF<sup>13</sup>. Perhaps most important, doing what you enjoy will help engagement and motivation. Adolescent patients reported activities that enhance fun and enjoyment and integrate physical activity into everyday life would be helpful to sustain participation<sup>14</sup>.

## REFERENCES

1. Nixon PA, Orenstein DM, Kelsey SF, Doershuk CF. The Prognostic Value of Exercise Testing in Patients with Cystic Fibrosis. *New England Journal of Medicine*. 1992;327(25):1785-1788.
2. Hebestreit H, Schmid K, Kieser S, et al. Quality of life is associated with physical activity and fitness in cystic fibrosis. *BMC Pulmonary Medicine*. 2014;14(1):26.
3. Dwyer TJ, Elkins MR, Bye PT. The role of exercise in maintaining health in cystic fibrosis. *Curr Opin Pulm Med*. 2011;17(6):455-460.
4. Cox NS, Alison JA, Button BM, Wilson JW, Morton JM, Holland AE. Physical activity participation by adults with cystic fibrosis: An observational study. *Respirology*. 2016;21(3):511-518.
5. Dwyer TJ, Griffin B, McKeough ZJ, Bye PT, Alison JA. Differences in quality of life, lung function and hospitalisation rates for adults with cystic fibrosis, according to exercise participation. *Journal of Cystic Fibrosis*. 2010;9:S69.

6. Moola FJ, Garcia E, Huynh E, et al. Physical Activity Counseling for Children With Cystic Fibrosis. *Respiratory Care*. 2017;62(11):1466-1473.
7. Selvadurai HC, Blimkie CJ, Meyers N, Mellis CM, Cooper PJ, Van Asperen PP. Randomized controlled study of in-hospital exercise training programs in children with cystic fibrosis. *Pediatric Pulmonology*. 2002;33(3):194-200.
8. Klijn PH, Oudshoorn A, van der Ent CK, van der Net J, Kimpen JL, Helders PJ. Effects of anaerobic training in children with cystic fibrosis: a randomized controlled study. *Chest*. 2004;125(4):1299-1305.
9. Wilkes DL, Schneiderman JE, Nguyen T, et al. Exercise and physical activity in children with cystic fibrosis. *Paediatr Respir Rev*. 2009;10(3):105-109.
10. Del Corral T, Cebrià I, Iranzo MÀ, López-De-Uralde-Villanueva I, Martínez-Alejos R, Blanco I, Vilaró J. Effectiveness of a Home-Based Active Video Game Programme in Young Cystic Fibrosis Patients. *Respiration*. 2018;95(2):87-97.
11. Ruddy J, Emerson J, McNamara S, et al. Yoga as a Therapy for Adolescents and Young Adults with Cystic Fibrosis: A Pilot Study. *Global Advances in Health and Medicine*. 2015;4(6):32-36.
12. Hebestreit H, Kieser S, Junge S, et al. Long-term effects of a partially supervised conditioning programme in cystic fibrosis. *European Respiratory Journal*. 2010;35(3):578-583.
13. Schneiderman-Walker J, Pollock SL, Corey M, et al. A randomized controlled trial of a 3-year home exercise program in cystic fibrosis. *J Pediatr*. 2000;136(3):304-310.

14. Denford S, Mackintosh KA, McNarry MA, Barker AR, Williams CA. Enhancing intrinsic motivation for physical activity among adolescents with cystic fibrosis: a qualitative study of the views of healthcare professionals. *BMJ Open*. 2019;9(6).

## **1.2 Health System Oriented Outcomes**

With improving health outcomes and the prospects of further advances with genetic modifiers, people with cystic fibrosis (CF) will increasingly become subject to the same health concerns as in the general population. The World Health Organisation (WHO) reminds us that exercise has significant physical and psychological health benefits but reports that 80% of the world's population is not active enough<sup>1</sup>. There is a growing recognition that physical inactivity has a significant global economic impact. In the United States (US) alone, it was estimated that there were more than 500,000 premature deaths and health care costs in excess of \$100 billion annually were caused by physical inactivity and obesity<sup>2</sup>. The RAND organisation estimated that increasing activity levels across the population could boost global GDP by up to \$726 billion (US) dollars by 2050<sup>3</sup>.

To date, there is no evidence to suggest a causal relationship between physical activity and exercise with health system-oriented outcomes such as hospitalisations or antibiotic use in people with CF. Previous research in chronic respiratory disease, such as people with chronic obstructive pulmonary disease (COPD) undergoing pulmonary rehabilitation (including aerobic and strength training) has been shown to reduce subsequent hospital admissions, bed days and decrease health-care costs<sup>4,5</sup>.

Respiratory exacerbations requiring hospital admission continue to be one of the hallmarks of CF, and the annual prevalence of respiratory exacerbations increases with age<sup>6</sup>. Hospitalisations are the primary reason for healthcare costs in CF<sup>7</sup>. A three-year longitudinal study found a significant association between greater aerobic fitness and lower risk of hospitalisation in 77 children with mild-moderate CF<sup>8</sup>. Similarly, an observational study found that greater time spent in moderate-vigorous PA was related to less hospital time at 12 months

<sup>9</sup> and increased antibiotic treatment over three years was linked to a lower VO2 max which thereby may impact on hospitalisations <sup>10</sup>.

It should be noted that there is limited reporting of respiratory exacerbations as an outcome measure in physical activity and exercise interventions in this cohort. Only one study in a Cochrane review of physical training interventions in CF reported on hospitalisations <sup>11</sup>. This study evaluated the effect of a three-year aerobic training program and found no significant difference between the mean number of hospital days or the mean number of hospitalisations at 1, 2 and 3-year follow ups <sup>11, 12</sup>. In contrast, a 1-year supervised, outpatient exercise intervention resulted in a significant reduction in the use of intravenous antibiotics when compared to the previous year and reported significant cost savings as a result <sup>13</sup>. Weekly supervised exercise sessions led to a 23% reduction in inpatient IV antibiotics, alongside a 20% reduction in home IV antibiotics with associated cost savings in 16 children with CF <sup>14</sup>. Future research should further evaluate the impact of exercise interventions on health system outcomes such as exacerbations, hospitalisations, and antibiotic use.

## REFERENCES

1. Bull FC, Al-Ansari SS, Biddle S, Borodulin K, Buman MP, Cardon G, et al. World Health Organization 2020 guidelines on physical activity and sedentary behaviour. *British Journal of Sports Medicine* 2020;54(24):1451-1462.
2. Myers J. The health benefits and economics of physical activity. *Current sports medicine reports* 2008;7(6):314-316.
3. Hafner M, Yerushalmi E, Phillips WD, Pollard J, Deshpande A, Whitmore M, et al. The economic benefits of a more physically active population: an international analysis. 2019.

4. Spruit MA, Singh SJ, Garvey C, ZuWallack R, Nici L, Rochester C, et al. An official American Thoracic Society/European Respiratory Society statement: key concepts and advances in pulmonary rehabilitation. *American journal of respiratory and critical care medicine* 2013;188(8):e13-e64.
5. Puhan MA, Gimeno-Santos E, Cates CJ, Troosters T. Pulmonary rehabilitation following exacerbations of chronic obstructive pulmonary disease. *Cochrane database of systematic reviews* 2016(12).
6. Cystic Fibrosis Foundation. Patient Registry: Annual Data Report
7. Van Gool K, Norman R, Delatycki MB, Hall J, Massie J. Understanding the costs of care for cystic fibrosis: an analysis by age and health state. *Value in health* 2013;16(2):345-355.
8. Pérez M, Groeneveld IF, Santana-Sosa E, Fiuza-Luces C, Gonzalez-Saiz L, Villa-Asensi JR, et al. Aerobic fitness is associated with lower risk of hospitalization in children with cystic fibrosis. *Pediatric pulmonology* 2014;49(7):641-649.
9. Cox NS, Alison JA, Button BM, Wilson JW, Morton JM, Holland AE. Physical activity participation by adults with cystic fibrosis: an observational study. *Respirology* 2016;21(3):511-518.
10. Vandekerckhove K, Keyzer M, Cornette J, Coomans I, Pyl F, De Baets F, et al. Exercise performance and quality of life in children with cystic fibrosis and mildly impaired lung function: relation with antibiotic treatments and hospitalization. *European journal of pediatrics* 2017;176(12):1689-1696.
11. Radtke T, Nevitt SJ, Hebestreit H, Kriemler S. Physical exercise training for cystic fibrosis. *Cochrane Database of Systematic Reviews* 2017(11).

12. Schneiderman-Walker J, Pollock SL, Corey M, Wilkes DD, Canny GJ, Pedder L, et al. A randomized controlled trial of a 3-year home exercise program in cystic fibrosis. *The Journal of pediatrics* 2000;136(3):304-310.
13. Urquhart D, Sell Z, Dhouieb E, Bell G, Oliver S, Black R, et al. Effects of a supervised, outpatient exercise and physiotherapy programme in children with cystic fibrosis. *Pediatric pulmonology* 2012;47(12):1235-1241.
14. Ledger SJ, Owen E, Prasad SA, Goldman A, Willams J, Aurora P. A pilot outreach physiotherapy and dietetic quality improvement initiative reduces IV antibiotic requirements in children with moderate–severe cystic fibrosis. *Journal of Cystic Fibrosis* 2013;12(6):766-772.



## **2 Health Benefits of Activity and Exercise**

### **2.1 Lung Health**

There have been several studies examining the relationship between exercise in lung health, primarily looking at lung function as a primary study outcome specifically forced expiratory volume in 1 second (FEV<sub>1</sub>) and forced vital capacity (FVC). More recent inclusions in the examination of lung health is that of lung clearance index (LCI). While it is well recognised that exercise is beneficial, the strength of the evidence to support a statement of preservation of lung health is challenging.

A study examined the longitudinal relationship between physical activity and lung health in a large cohort of 212 children. There was a significant correlation between the rates of change of activity level and change in FEV<sub>1</sub> decline, indicating that an increasing activity is associated with a slower rate of decline ( $p \leq 0.007$ ) and thus the possibility of affecting survival (1).

Three systematic reviews concluded unclear effects of exercise on FEV<sub>1</sub>, due to a wide range of study design, heterogeneous exercise training modalities and duration of intervention. (2, 3, 4). Studies that evaluated the longer time effect of exercise concluded that exercise slows the decline in lung function. (5, 6, 7). In a study with a 2-year follow up, the control group demonstrated a greater mean annual rate in decline of percentage predicted FVC compared to exercise group ( $p = 0.02$ ) with a similar trend for FEV<sub>1</sub> ( $p = 0.07$ ) (5). Another study showed a better preserved FEV<sub>1</sub> at 1-year with exercise intervention, small improvements in FVC in the active group but significant decline in FVC in the inactive group (6). A retrospective study including 1038 twins or siblings with a minimum of 4 FEV<sub>1</sub> values taken over a period of no less than 2 years, showed that those reporting exercise had a high baseline FEV<sub>1%</sub> predicted than those that did not ( $p = 0.001$ ). Also, that exercising adults with CF would experience a smaller

decline in FEV<sub>1</sub> compared to exercising children, suggesting adults received more benefit. Finally, that subjects with a lower FEV<sub>1</sub> who perform any exercise may benefit disproportionately better than those with a better lung function in terms of FEV<sub>1</sub> decline (7).

Studies have evaluated the effect of different exercise interventions and dose response on lung function. (8, 9). A study looked at a single bout of maximal exercise displaying a significant increase in FVC ( $p < 0.002$ ) and FEV<sub>1</sub> ( $p < 0.002$ ). Pre- and post-LCI was examined, displaying a significant reduction ( $p < 0.05$ ). This study suggested that higher intensity exercise may contribute to greater improvements in pulmonary function (8). A further study examined the potential difference between strength and aerobic training compared to controls. This RCT showed a significant increase in FEV<sub>1</sub> in both training groups when compared to controls ( $p < 0.001$ ) but the effects had been lost by 18 months post exercise program (9).

## **REFERENCES**

- 1 Schneiderman J., Wilkes D., Atenafu E.G., Nguyen T., et al., Longitudinal relationship between physical activity and lung health in patients with cystic fibrosis. *Eur Respir J*, 2014, 43: 817-823. DOI: 10.1183/09031936.00055513
- 2 Radtke T., Nevitt S.J., Hebestreit H., Kriemler S., Physical Exercise Training for Cystic Fibrosis. *Cochrane Database of Systematic Reviews*, 2017, Issue 11. Art. No.: CD002768. DOI: 10.1002/14651858.CD002768.pub4.
- 3 Radtke T., Nolan S.J., Hebestreit H., Kriemler S., Physical Exercise training for Cystic Fibrosis. *Pediatr. Respir. Rev.*, 2016. DOI: 10.1016/j.prrv.2015.12.004
- 4 Bradley J.M., Moran F., Physical Training for Cystic Fibrosis, *Cochrane Database of Systematic Reviews*, 2012, Issue 1. Art. No.: CD002768. DOI: 10.1002/14651858.CD002768.pub2.

- 5 Shneiderman-Walker J., Pollock S.L., Corey M., Wilkes D.D., et al., A randomized controlled trial of 3 year home exercise program in cystic fibrosis. *The Journal of Pediatrics*, 2014, Volume 136, Art. No.:3. DOI: 10.1067/mpd.2000.103408
- 6 Moorcroft A.J., Dodd M.E., Morris J., Webb A.K., Individualised unsupervised exercise training in adults with cystic fibrosis: a 1 year randomised controlled trial. *Thorax*, 2004, 59: 1074-1080. DOI: 10.1136/thx.2003.015313
- 7 Collaco J.M., Blackman S.M., Raraigh K.S., Morrow C.B., et al., Self-reported exercise and longitudinal outcomes in cystic fibrosis: a retrospective cohort study. *BMC Pulmonary Medicine*, 2014, 14:159. <http://www.biomedcentral.com/1471-2466/14/159>
- 8 Tucker M., Crandall R., Seigler N., Rodriguez-Miguel P., et al., A single bout of maximal exercise improves lung function in patients with cystic fibrosis. *Journal of Cystic Fibrosis*, 2017, 16: 752-758. DOI: 10.1016/j.jcf.2017.05.011
- 9 Kriemler S., Kieser S., Junge S., Ballmann M., et al., Effect of supervised training on FEV1 in cystic fibrosis: A randomized controlled trial. *Journal of Cystic Fibrosis*, 2013, 12: 714-720. DOI: 10.1016/j.jcf.2013.03.003

## **2.2 Cardiovascular Health**

The increased life expectancy of people with cystic fibrosis (CF) increases the risk of age-associated pathology, such as cardiovascular diseases, which may be a primary or secondary consequence of CF (1). There is evidence of left ventricular dysfunction (2), increased arterial stiffness (3) and reduced large (4) and small (5) vessel function in people with CF. Therefore, it is important to examine whether physical activity (PA) and/or exercise can modify markers of cardiovascular health and associated risk factors.

A Cochrane review published in 2017 (6) identified 11 exercise training studies that examined body size and composition outcomes utilising either aerobic (n=5), anaerobic (n=3) or combined (n=3) exercise programmes in people with CF. The review found no consistent evidence for improvements in body mass, body mass index or body composition (fat free mass, body fat percentage). No other cardiovascular health outcomes were reported in the review. One study did measure blood pressure at baseline of a 3-year home-based aerobic exercise programme, but did not report the intervention effect (7). More recently, there are promising results showing resistance exercise may improve heart rate variability in children and adolescents with CF (8).

Data from observational studies suggests that habitual PA is positively associated with body mass percentile in children and adolescents with CF, especially in patients with mild to severe disease (9, 10). Furthermore, a recent study reported a positive association between accelerometer derived moderate to vigorous intensity PA and heart rate variability in 6-18 year olds with CF (11). Therefore, observational studies support a potential relationship between PA and a limited number of cardiovascular health outcomes in CF. However, these associations are not consistently reported (12), and are restricted to cross-sectional designs with a lack of

adjustment for key confounders (i.e. age, sex, disease severity, fitness, body size and composition).

Few studies have undertaken direct measures blood vessel outcomes in relation to either PA or exercise. Vascular endothelial function is related to markers of aerobic fitness in people with CF (4). As aerobic fitness and physical activity have been shown to be related in CF (13), this suggests a putative relationship between vascular outcomes and physical activity, but this has yet to be explored. Using an acute exercise model, adults with CF have been shown to increase blood flow during forearm exercise with no differences to healthy controls, suggesting a similar exercise hyperaemic response (14). There are also data to suggest adults with CF may experience a transient increase in central arterial stiffness in response to a bout aerobic cycling exercise (15). However, these observations have yet to be replicated and the effect of long-term physical activity and exercise interventions on heart function, arterial stiffness and large and small vessel function in CF are yet to be established.

Although there is tentative evidence that PA and exercise can improve cardiovascular health in people with CF, there is a need for well-controlled randomised controlled trials and observational studies incorporating cardiovascular health measures and associated risk factors.

## **REFERENCES**

1. Poore TS, Taylor-Cousar JL, Zemanick ET. Cardiovascular complications in cystic fibrosis: A review of the literature. *J Cyst Fibros.* 2021.
2. Bano-Rodrigo A, Salcedo-Posadas A, Villa-Asensi JR, Tamariz-Martel A, Lopez-Neyra A, Blanco-Iglesias E. Right ventricular dysfunction in adolescents with mild cystic fibrosis. *J Cyst Fibros.* 2012;11(4):274-80.

3. Kartal Öztürk G, Conkar S, Eşki A, Gülen F, Keskinoglu A, Demir E. Evaluation of increased arterial stiffness in pediatric patients with cystic fibrosis by augmentation index and pulse wave velocity analysis. *Pediatric Pulmonology*. 2020;55(5):1147-53.
4. Poore S, Berry B, Eidson D, McKie KT, Harris RA. Evidence of vascular endothelial dysfunction in young patients with cystic fibrosis. *Chest*. 2013;143(4):939-45.
5. Rodriguez-Miguel P, Thomas J, Seigler N, Crandall R, McKie KT, Forseen C, et al. Evidence of microvascular dysfunction in patients with cystic fibrosis. *Am J Physiol-Heart C*. 2016;310(11):H1479-H85.
6. Radtke T, Nevitt SJ, Hebestreit H, Kriemler S. Physical exercise training for cystic fibrosis. *Cochrane Db Syst Rev*. 2017(11).
7. Schneiderman-Walker J, Pollock SL, Corey M, Wilkes DD, Canny GJ, Pedder L, et al. A randomized controlled trial of a 3-year home exercise program in cystic fibrosis. *J Pediatr*. 2000;136(3):304-10.
8. Estevez-Gonzalez AJ, Donadio MVF, Cobo-Vicente F, Fernandez-Luna A, Sanz-Santiago V, Villa Asensi JR, et al. Effects of a Short-Term Resistance-Training Program on Heart Rate Variability in Children With Cystic Fibrosis-A Randomized Controlled Trial. *Front Physiol*. 2021;12:652029.
9. Boucher GP, Lands LC, Hay JA, Hornby L. Activity levels and the relationship to lung function and nutritional status in children with cystic fibrosis. *Am J Phys Med Rehabil*. 1997;76(4):311-5.
10. Selvadurai HC, Blimkie CJ, Cooper PJ, Mellis CM, Van Asperen PP. Gender differences in habitual activity in children with cystic fibrosis. *Arch Dis Child*. 2004;89(10):928-33.
11. Coelho PdF, Barbosa RRB, Lugao RdS, Liberato FMG, Vidal PR, Melotti RdCNC, et al. Heart rate variability, exercise capacity and levels of daily physical activity in children and

adolescents with mild-to-moderate cystic fibrosis. *Hong Kong Physiotherapy Journal*.0(0):1-10.

12. Nixon PA, Orenstein DM, Kelsey SF. Habitual physical activity in children and adolescents with cystic fibrosis. *Med Sci Sports Exerc*. 2001;33(1):30-5.

13. Hebestreit H, Kieser S, Rudiger S, Schenk T, Junge S, Hebestreit A, et al. Physical activity is independently related to aerobic capacity in cystic fibrosis. *Eur Respir J*. 2006;28(4):734-9.

14. Schrage WG, Wilkins BW, Dean VL, Scott JP, Henry NK, Wylam ME, et al. Exercise hyperemia and vasoconstrictor responses in humans with cystic fibrosis. *J Appl Physiol*. 2005;99(5):1866-71.

15. Hull JH, Ansley L, Bolton CE, Sharman JE, Knight RK, Cockcroft JR, et al. The effect of exercise on large artery haemodynamics in cystic fibrosis. *J Cyst Fibros*. 2011;10(2):121-7.

### **2.3 Musculoskeletal Health**

Musculoskeletal alterations exist in people with CF and have various clinical consequences. People with CF have reductions in both limb muscle mass and strength, with lower limbs muscles being generally more affected (1-3), and these alterations are associated with reduced whole-body exercise performance (4-7). It is of note that recent improvements in treatment and management of CF have resulted in significant improvements in nutritional status, and caution is needed when extrapolating findings obtained over the past several decades to the current CF generation. However, recent reports still indicate a high prevalence of limb fat-free mass (FFM) depletion in young people with CF, which is associated with worse clinical outcomes(8), demonstrating the importance of developing exercise interventions that target reduced limb muscle mass and strength.

Most studies using aerobic training alone or combined with resistance training in people with CF did not find improvements in FFM (9-11). However, resistance training alone or combined with aerobic training was effective in improving limb muscle strength in several studies (9, 11, 12), highlighting that short-term changes in muscle strength are possible in the absence of muscle hypertrophy and are most likely related to neural factors. Obtaining positive changes in limb muscle mass may require longer training duration and/or individualized resistance training programs with appropriate volume and intensity tailored to an individual. For instance, an in-hospital supervised resistance training program resulted in improvements in both limb muscle mass and strength in children with CF whereas endurance training did not (13). People with CF who cannot engage in conventional exercise strategies (e.g., during severe exacerbation, pre- and post-transplant) may also benefit from adjunct approaches such a neuromuscular stimulation



(NMES). Six weeks of NMES performed prior to 8 weeks of aerobic training increased thigh circumference and quadriceps strength and decreased dyspnoea on 6MWT, compared to controls (i.e., same aerobic training without prior NMES) in adults with CF and severe lung disease (14).

Increased life expectancy for people with CF also presents new issues for chronic musculoskeletal diseases that present later in adult life, such as osteopenia and osteoporosis (15). Cross sectional studies suggest a beneficial effect of exercise and PA on CF bone health, as greater PA levels and aerobic capacity are associated with higher bone mineral density (16, 17). However, data regarding the impacts of an exercise training regimen on bone health in people with CF are very limited. A lone RCT involving one year of resistance training in children and adolescents with CF did not find significant changes on bone mineral density determined by dual energy X-ray absorptiometry (18). However, the exercise programme was unsupervised, and no measurements of muscle function were performed which casts doubt on whether a sufficient training stimulus was achieved.

## **REFERENCES**

1. Elkin SL, Williams L, Moore M, Hodson ME, Rutherford OM. Relationship of skeletal muscle mass, muscle strength and bone mineral density in adults with cystic fibrosis. *Clin Sci (Lond)*. 2000;99(4):309-14.
2. Gruet M, Troosters T, Verges S. Peripheral muscle abnormalities in cystic fibrosis: Etiology, clinical implications and response to therapeutic interventions. *J Cyst Fibros*. 2017;16(5):538-52.
3. Bolton CE, Ionescu AA, Evans WD, Pettit RJ, Shale DJ. Altered tissue distribution in adults with cystic fibrosis. *Thorax*. 2003;58(10):885-9.

4. de Meer K, Gulmans VA, van Der Laag J. Peripheral muscle weakness and exercise capacity in children with cystic fibrosis. *Am J Respir Crit Care Med.* 1999;159(3):748-54.
5. Ruf K, Beer M, Kostler H, Weng AM, Neubauer H, Klein A, et al. Size-adjusted muscle power and muscle metabolism in patients with cystic fibrosis are equal to healthy controls - a case control study. *BMC Pulm Med.* 2019;19(1):269.
6. Gruet M, Decorte N, Mely L, Vallier JM, Camara B, Quetant S, et al. Skeletal muscle contractility and fatigability in adults with cystic fibrosis. *J Cyst Fibros.* 2016;15(1):e1-8.
7. Troosters T, Langer D, Vrijzen B, Segers J, Wouters K, Janssens W, et al. Skeletal muscle weakness, exercise tolerance and physical activity in adults with cystic fibrosis. *Eur Respir J.* 2009;33(1):99-106.
8. Ritchie H, Nahikian-Nelms M, Roberts K, Gemma S, Shaikhkhalil A. The prevalence of aberrations in body composition in pediatric cystic fibrosis patients and relationships with pulmonary function, bone mineral density, and hospitalizations. *Journal of Cystic Fibrosis.* 2021.
9. Santana Sosa E, Groeneveld IF, Gonzalez-Saiz L, Lopez-Mojares LM, Villa-Asensi JR, Barrio Gonzalez MI, et al. Intrahospital weight and aerobic training in children with cystic fibrosis: a randomized controlled trial. *Med Sci Sports Exerc.* 2012;44(1):2-11.
10. Hebestreit H, Kieser S, Junge S, Ballmann M, Hebestreit A, Schindler C, et al. Long-term effects of a partially supervised conditioning programme in cystic fibrosis. *Eur Respir J.* 2010;35(3):578-83.
11. Beaudoin N, Bouvet GF, Coriati A, Rabasa-Lhoret R, Berthiaume Y. Combined Exercise Training Improves Glycemic Control in Adult with Cystic Fibrosis. *Med Sci Sports Exerc.* 2017;49(2):231-7.

12. Rovedder PM, Flores J, Ziegler B, Casarotto F, Jaques P, Barreto SS, et al. Exercise programme in patients with cystic fibrosis: a randomized controlled trial. *Respir Med.* 2014;108(8):1134-40.
13. Selvadurai HC, Blimkie CJ, Meyers N, Mellis CM, Cooper PJ, Van Asperen PP. Randomized controlled study of in-hospital exercise training programs in children with cystic fibrosis. *Pediatr Pulmonol.* 2002;33(3):194-200.
14. Vivodtzev I, Decorte N, Wuyam B, Gonnet N, Durieu I, Levy P, et al. Benefits of neuromuscular electrical stimulation prior to endurance training in patients with cystic fibrosis and severe pulmonary dysfunction. *Chest.* 2013;143(2):485-93.
15. Chedevergne F, Sermet-Gaudelus I. Prevention of osteoporosis in cystic fibrosis. *Curr Opin Pulm Med.* 2019;25(6):660-5.
16. Tejero Garcia S, Giraldez Sanchez MA, Cejudo P, Quintana Gallego E, Dapena J, Garcia Jimenez R, et al. Bone health, daily physical activity, and exercise tolerance in patients with cystic fibrosis. *Chest.* 2011;140(2):475-81.
17. Frangolias DD, Paré PD, Kendler DL, Davidson AGF, Wong L, Raboud J, et al. Role of exercise and nutrition status on bone mineral density in cystic fibrosis. *Journal of Cystic Fibrosis.* 2003;2(4):163-70.
18. Gupta S, Mukherjee A, Lodha R, Kabra M, Deepak KK, Khadgawat R, et al. Effects of Exercise Intervention Program on Bone Mineral Accretion in Children and Adolescents with Cystic Fibrosis: A Randomized Controlled Trial. *Indian J Pediatr.* 2019;86(11):987-94.
19. Litvin M, Yoon JC, Leey Casella J, Blackman SM, Brennan AL. Energy balance and obesity in individuals with cystic fibrosis. *J Cyst Fibros.* 2019;18 Suppl 2:S38-S47.

## 2.4 Fitness and Strength

Physical fitness has been shown to be an important predictor of health outcomes for people with cystic fibrosis (CF) [1]. Higher aerobic capacity has been associated with higher life expectancy, increased quality of life and level of professional achievement [2]. The health benefits of activity and exercise on fitness in CF have been extensively researched. Numerous randomised control trials, involving interventions that varied in type of exercise, intensity of exercise, and duration of intervention have been conducted in in-patient outpatient and home settings, with varying levels of healthcare staff supervision[3–18]. Some of these studies were well powered [8,13] whilst others had significant follow up periods [7,14]. Overall, a Cochrane database systematic review concluded that there was some evidence that exercise is beneficial for aerobic fitness, and that no negative side effects of exercise exist for people with CF [19].

The effect of exercise on increasing and maintaining fitness has been quantified predominantly through the measurement of peak oxygen uptake ( $\dot{V}O_{2\text{peak}}$ ) [3,5–10,13–16]. One well powered study [14], found that a six month, home based conditioning programme increased  $\dot{V}O_{2\text{peak}}$  by  $3.72 \text{ mL}\cdot\text{kg}^{-1}\cdot\text{min}^{-1} \pm 1.23 \text{ mL}\cdot\text{kg}^{-1}\cdot\text{min}^{-1}$  ( $p < 0.01$ ) in a sample of people with CF, aged between 12-40 years. These improvements were maintained more than a year after the intervention had ended, with authors suggesting the intervention encouraged participants to continue new exercise habits and therefore, maintain fitness too. Another study found 3 months of supervised anaerobic training intervals (i.e. HIIT) produced a statistically significant 5% increase in  $\dot{V}O_{2\text{peak}}$  [16]. Shorter duration interventions have also been shown to be effective, with 8 weeks of supervised out-patient exercise sessions, delivered in hospital also reporting improvements in  $\dot{V}O_{2\text{peak}}$  (increases of  $3.9 \text{ mL}\cdot\text{kg}^{-1}\cdot\text{min}^{-1}$   $p = 0.002$ ) [6]. Whilst there is no published data on minimum clinically important difference in  $\dot{V}O_{2\text{peak}}$  in people with CF, it has been reported to be  $1.54 \text{ mL}\cdot\text{kg}^{-1}\cdot\text{min}^{-1}$  in adults with chronic renal disease [20]. This indicates exercise

interventions in people with CF are like to result in noticeable increases in exercise capacity. Interestingly, these gains in  $\dot{V}O_{2\text{peak}}$  were lost ( $-3.4 \text{ mL}\cdot\text{kg}^{-1}\cdot\text{min}^{-1}$ ,  $p = 0.001$ ) following a 4-week detraining period, when participants were instructed not to exercise [6]. This illustrates the trainability of fitness in people with CF, despite ongoing disease processes. Of note, anaerobic training has been shown to produce some sustained benefits in anaerobic performance [16].

Limitations to the outcome measures used when measuring fitness in CF have been highlighted. One 3 year home-based intervention failed to report improvements in fitness, however it was suggested that this was due to high levels of participants fitness at baseline, limiting potential for improvement in  $\dot{V}O_{2\text{peak}}$  [7]. Two studies identified possible limitations to measurement of the effect of an exercise intervention due to the 6MWT not being sensitive enough to detect change after treatment [9,18]. It is possible that these factors have led to the effect of exercise on fitness in people with CF to be underestimated across the evidence base.

The evidence shows that home-based exercise, designed around patient preference, not directly supervised by healthcare staff is effective in improving fitness, thereby reducing requirement to physically attend the CF centre [14,17]. However, it should be noted, that fitness and strength can also be increased with intervention during hospital admission for an infective exacerbation in patients with CF [9]. Engaging individuals in long term exercise routines regardless of setting is of key importance.

Higher intensity interventions gained better results, suggesting the presence of a dose response of exercise on fitness [3,10,11,13,16]. These included plyometric, weights-based programs, anaerobic interval training and use of a percentage of maximum effort, for example between

60-80% of  $\dot{V}O_{2\text{peak}}$  or treadmill max velocity. Interventions [3,15] without intensity monitoring and progression, or insufficient frequency, did not see an improvement in aerobic fitness. Due to the heterogeneity of intensity and duration of interventions in the literature it is difficult to provide guidance on recommendations other than that increased dosage leads to increased results. Progression of intensity throughout an exercise

## REFERENCES

- [1] Nixon PA, Orenstein DM, Kelsey SF, Doershuk CF. The prognostic value of exercise testing in patients with cystic fibrosis. *N Engl J Med* 1992;327:1785–8. doi:10.1056/NEJM199212173272504.
- [2] Hebestreit H, Kieser S, Rüdiger S, Schenk T, Junge S, Hebestreit A, et al. Physical activity is independently related to aerobic capacity in cystic fibrosis. *Eur Respir J* 2006;28:734–9. doi:10.1183/09031936.06.00128605.
- [3] Beaudoin N, Bouvet GF, Coriati A, Rabasa-Lhoret R, Berthiaume Y. Combined Exercise Training Improves Glycemic Control in Adult with Cystic Fibrosis. *Med Sci Sports Exerc* 2017;49:231–7. doi:10.1249/MSS.0000000000001104.
- [4] Cerny FJ. Relative effects of bronchial drainage and exercise for in-hospital care of patients with cystic fibrosis. *Phys Ther* 1989;69:633–9. doi:10.1093/ptj/69.8.633.
- [5] Santana-Sosa E, Gonzalez-Saiz L, Groeneveld IF, Villa-Asensi JR, De Agüero MIBG, Fleck SJ, et al. Benefits of combining inspiratory muscle with “whole muscle” training in children with cystic fibrosis: A randomised controlled trial. *Br J Sports Med* 2014;48:1513–7. doi:10.1136/bjsports-2012-091892.
- [6] Sosa ES, Groeneveld IF, Gonzalez-Saiz L, López-Mojares LM, Villa-Asensi JR, Gonzalez MIB, et al. Intrahospital weight and aerobic training in children with cystic fibrosis: A randomized controlled trial. *Med Sci Sports Exerc* 2012;44:2–11.

doi:10.1249/MSS.0b013e318228c302.

- [7] Schneiderman-Walker J, Pollock SL, Corey M, Wilkes DD, Canny GJ, Pedder L, et al. A randomized controlled trial of a 3-year home exercise program in cystic fibrosis. *J Pediatr* 2000;136:304–10. doi:10.1067/mpd.2000.103408.
- [8] Orenstein DM, Hovell MF, Mulvihill M, Keating KK, Hofstetter CR, Kelsey S, et al. Strength vs aerobic training in children with cystic fibrosis: A randomized controlled trial. *Chest* 2004;126:1204–14. doi:10.1378/chest.126.4.1204.
- [9] Vivodtzev I, Decorte N, Wuyam B, Gonnet N, Durieu I, Levy P, et al. Benefits of neuromuscular electrical stimulation prior to endurance training in patients with cystic fibrosis and severe pulmonary dysfunction. *Chest* 2013;143:485–93. doi:10.1378/chest.12-0584.
- [10] Selvadurai HC, Blimkie CJ, Meyers N, Mellis CM, Cooper PJ, Van Asperen PP. Randomized controlled study of in-hospital exercise training programs in children with cystic fibrosis. *Pediatr Pulmonol* 2002;33:194–200. doi:10.1002/ppul.10015.
- [11] De Oliveira ACN, De Oliveira JCM, Mesquita-Ferrari RA, Damasceno N, Oliveira LVF, Sampaio LMM. Inflammatory process modulation in children with cystic fibrosis submitted to aerobic training. *Arch Med Sci* 2009;5:422–6.
- [12] Del Corral T, Cebrià Iranzo MÀ, López-de-Uralde-Villanueva I, Martínez-Alejos R, Blanco I, Vilaró J. Effectiveness of a home-based active video game programme in young cystic fibrosis patients. *Respiration* 2018;95:87–97. doi:10.1159/000481264.
- [13] Gupta S, Mukherjee A, Lodha R, Kabra M, Deepak KK, Khadgawat R, et al. Effects of Exercise Intervention Program on Bone Mineral Accretion in Children and Adolescents with Cystic Fibrosis: A Randomized Controlled Trial. *Indian J Pediatr* 2019;86:987–94. doi:10.1007/s12098-019-03019-x.
- [14] Hebestreit H, Kieser S, Junge S, Ballmann M, Hebestreit A, Schindler C, et al. Long-

- term effects of a partially supervised conditioning programme in cystic fibrosis. *Eur Respir J* 2010;35:578–83. doi:10.1183/09031936.00062409.
- [15] Hommerding PX, Baptista RR, Makarewicz GT, Schindel CS, Donadio MVF, Pinto LA, et al. Effects of an educational intervention of physical activity for children and adolescents with cystic fibrosis: A randomized controlled trial. *Respir Care* 2015;60:81–7. doi:10.4187/respcare.02578.
- [16] Klijn PHC, Oudshoorn A, Van Der Ent CK, Van Der Net J, Kimpfen JL, Helders PJM. Effects of anaerobic training in children with cystic fibrosis: A randomized controlled study. *Chest* 2004;125:1299–305. doi:10.1378/chest.125.4.1299.
- [17] Moorcroft AJ, Dodd ME, Morris J, Webb AK. Individualised unsupervised exercise training in adults with cystic fibrosis: A 1 year randomised controlled trial. *Thorax* 2004;59:1074–80. doi:10.1136/thx.2003.015313.
- [18] Rovedder PME, Flores J, Ziegler B, Casarotto F, Jaques P, Barreto SSM, et al. Exercise programme in patients with cystic fibrosis: A randomized controlled trial. *Respir Med* 2014;108:1134–40. doi:10.1016/j.rmed.2014.04.022.
- [19] Radtke T, Nolan SJ, Hebestreit H, Kriemler S. Physical exercise training for cystic fibrosis. *Cochrane Database Syst Rev* 2015;6:CD002768. doi:10.1002/14651858.CD002768.pub3.
- [20] Wilkinson TJ, Watson EL, Xenophontos S, Gould DW, Smith AC. The “minimum Clinically Important Difference” in Frequently Reported Objective Physical Function Tests after a 12-Week Renal Rehabilitation Exercise Intervention in Nondialysis Chronic Kidney Disease. *Am J Phys Med Rehabil* 2019;98:431–7. doi:10.1097/PHM.0000000000001080.



## 2.5 Endocrine and Inflammatory Function

Several endocrine disorders are associated with cystic fibrosis (CF), including bone disease (see: Musculoskeletal health), male hypogonadism, delayed puberty and, most commonly, CF-related diabetes (CFRD)<sup>1</sup>. CFRD affects approximately a third of adults with CF<sup>2,3</sup> and is a distinct subtype that contains aspects of both type I and II diabetes mellitus, characterised by post-prandial hyperglycaemia due to insulin insufficiency<sup>1,4,5</sup>. Current treatment for CFRD is predominately insulin therapy<sup>1,6</sup>, however CFTR modulators may reduce the need for insulin in individuals with CFRD<sup>5</sup>. In non-CF diabetes, exercise training interventions are recommended to improve glycaemic control<sup>7,8</sup>.

While the onset of dysglycaemia is associated with a reduced exercise capacity in both paediatric and adult populations with CF<sup>9,10</sup>, there is scarce evidence investigating the effects of exercise training interventions on glycaemic control, with one ongoing clinical trial (NCT03653949<sup>11</sup>). One study showed improved glycaemic control by oral glucose tolerance test, without a change in HbA1c, in 14 individuals with CF-related dysglycaemia following a 12-week combined aerobic and resistance training programme<sup>12</sup>. A recent multicentre trial involving 117 people with CF over the age of 12 reported no effect on glucose tolerance after a 12 week training programme involving 3 hours of intense physical activity per week<sup>13</sup>. The incidence of hypoglycaemia with exercise is reportedly low in CFRD<sup>14</sup> and precautions such as blood glucose monitoring, carbohydrate snacks or altered insulin doses with vigorous exercise are recommended<sup>4,15</sup>. In non-CF diabetes, a risk of hyperglycaemia has been reported following short periods of intense exercise<sup>16,17</sup>, and while there is no evidence from CF populations, current guidelines recommend people with CFRD participate in moderate aerobic exercise[2,15].

The occurrence of hyperglycaemic events – in addition to respiratory, cardiovascular, metabolic and skeletomuscular diseases – result in chronic low-grade inflammation and systemic oxidative stress in people with CF<sup>18,19</sup>. While pharmacological interventions (e.g. CFTR modulators) relieve inflammation and oxidative stress by upregulating anti-inflammatory and -oxidant transcriptional factors at the cellular level<sup>20</sup>, conflicting evidence in humans results in a requirement for adjuvant therapies<sup>21</sup>. One such intervention is exercise training, and the resultant improvements in physical fitness, which are associated with a reduction in inflammation and oxidative stress in healthy humans<sup>22</sup>; however, the evidence in people with CF is unclear.

Six-to-twelve weeks of aerobic and/or resistance training in children-to-adults with CF was not reported to modulate c-reactive protein<sup>12,23,24</sup>. Furthermore, c-reactive protein was either indifferent<sup>25</sup> or lower<sup>26</sup> in those who are considered physically active, compared to their sedentary counterparts. Six-to-eight weeks of exercise training was also not reported to modulate cytokine expression in the blood of children or adults with CF<sup>12,23</sup>. Preliminary evidence suggests that combined resistance and aerobic exercise training upregulates YKL-40 in adults with CF, which could be a signalling factor for enhanced muscle insulin sensitivity<sup>12</sup>. In contrast, a marker of bacterial infection-associated inflammation, procalcitonin, was downregulated by eight weeks of aerobic exercise training<sup>23</sup>. One observational study demonstrated that increased physical activity was associated with lower systemic inflammation (IL-6, IL-8 and TNF- $\alpha$ ) post-CF exacerbation<sup>27</sup>. Neither antioxidants or oxidative stress were differentially modulated during moderate-to-heavy intensity cycling between adolescents with CF and their healthy counterparts<sup>28</sup>; however, no studies have investigated the effect of longer-term exercise training on redox biomarkers in people with CF. Therefore, it remains unclear

whether exercise is an effective intervention to reduce inflammation and oxidative stress in people with CF.

## REFERENCES

1. Blackman SM, Tangpricha V. Endocrine Disorders in Cystic Fibrosis. *Pediatr Clin North Am.* 2016;63(4):699-708. doi:10.1016/j.pcl.2016.04.009
2. Foundation CF. Patient Registry: Annual Data Report. 2019.
3. UK Cystic Fibrosis Registry. 2019 Annual Data Report. <https://www.cysticfibrosis.org.uk/~media/documents/the-work-we-do/uk-cf-registry/full-registry-report-2015.ashx?la=en>.
4. Moran A, Brunzell C, Cohen RC, et al. Clinical Care Guidelines for Cystic Fibrosis–Related Diabetes A position statement of the American Diabetes Association and a clinical practice guideline of the Cystic Fibrosis Foundation, endorsed by the Pediatric Endocrine Society. *Diabetes Care.* 2010;33(12):2697-2708. doi:10.2337/dc10-1768
5. Gaines H, Jones KR, Lim J, Medhi NF, Chen S, Scofield RH. Effect of CFTR modulator therapy on cystic fibrosis-related diabetes. *J Diabetes Complications.* 2021;35(6):107845. doi:10.1016/j.jdiacomp.2020.107845
6. Siwamogsatham O, Alvarez JA, Tangpricha V. Diagnosis and treatment of endocrine comorbidities in patients with cystic fibrosis. *Curr Opin Endocrinol Diabetes Obes.* 2014;21(5):422-429. doi:10.1097/MED.0000000000000096
7. Colberg SR, Sigal RJ, Yardley JE, et al. Physical Activity/Exercise and Diabetes: A Position Statement of the American Diabetes Association. *Diabetes Care.* 2016;39(11):2065-2079. doi:10.2337/dc16-1728
8. Thomas D, Elliott EJ, Naughton GA. Exercise for type 2 diabetes mellitus. *Cochrane Database Syst Rev.* 2006;(3):CD002968. doi:10.1002/14651858.CD002968.pub2

9. Causer AJ, Shute JK, Cummings MH, et al. The implications of dysglycaemia on aerobic exercise and ventilatory function in cystic fibrosis. *J Cyst Fibros*. 2019. doi:10.1016/j.jcf.2019.09.014
10. Foster K, Huang G, Zhang N, et al. Relationship between exercise capacity and glucose tolerance in cystic fibrosis. *Pediatr Pulmonol*. 2017;(November). doi:10.1002/ppul.23906
11. Monteiro KS, Azevedo M de P, Jales LM, da Silva FEP, Arrais RF, de Mendonça KMPP. Effects of aerobic interval training on glucose tolerance in children and adolescents with cystic fibrosis: a randomized trial protocol. *Trials*. 2019;20(1):768. doi:10.1186/s13063-019-3803-8
12. Beaudoin N, Bouvet GF, Coriati A, Rabasa-Lhoret R, Berthiaume Y. Combined Exercise Training Improves Glycemic Control in Adult with Cystic Fibrosis. *Med Sci Sport Exerc*. 2017;49(2):231-237. doi:10.1249/MSS.0000000000001104
13. Hebestreit H, Kriemler S, Schindler C, et al. WS04.6 Effects of a partially supervised conditioning program in cystic fibrosis: an international multi-centre, randomised controlled trial (ACTIVATE-CF). *J Cyst Fibros*. 2021;20:S8. doi:https://doi.org/10.1016/S1569-1993(21)00938-3
14. Ruf K, Winkler B, Hebestreit A, Gruber W, Hebestreit H. Risks associated with exercise testing and sports participation in cystic fibrosis. *J Cyst Fibros*. 2010;9(5):339-345. doi:10.1016/j.jcf.2010.05.006
15. Association of Chartered Physiotherapists in Cystic Fibrosis (ACPCF). Standards of Care and Good Clinical Practice for the Physiotherapy Management of cystic fibrosis. *Cyst Fibros Trust*. 2020;(April). [https://www.cysticfibrosis.org.uk/media/82076/CD\\_Standards\\_of\\_Care\\_Physio\\_Jun\\_11.pdf](https://www.cysticfibrosis.org.uk/media/82076/CD_Standards_of_Care_Physio_Jun_11.pdf).

16. Lespagnol E, Boccock O, Heyman J, et al. In Amateur Athletes With Type 1 Diabetes, a 9-Day Period of Cycling at Moderate-to-Vigorous Intensity Unexpectedly Increased the Time Spent in Hyperglycemia, Which Was Associated With Impairment in Heart Rate Variability. *Diabetes Care*. 2020;43(10):2564-2573. doi:10.2337/dc19-1928
17. Mitchell TH, Abraham G, Schiffrin A, Leiter LA, Marliss EB. Hyperglycemia after intense exercise in IDDM subjects during continuous subcutaneous insulin infusion. *Diabetes Care*. 1988;11(4):311-317.
18. Causer AJ, Shute JK, Cummings MH, et al. Circulating biomarkers of antioxidant status and oxidative stress in people with cystic fibrosis: A systematic review and meta-analysis. *Redox Biol*. 2020;32. doi:10.1016/j.redox.2020.101436
19. Nichols DP, Chmiel JF. Inflammation and its genesis in cystic fibrosis. *Pediatr Pulmonol*. 2015;50:S39-S56. doi:10.1002/ppul.23242
20. Borcherdig DC, Siefert ME, Lin S, et al. Clinically approved CFTR modulators rescue Nrf2 dysfunction in cystic fibrosis airway epithelia. *J Clin Invest*. 2019;129(8):3448-3463. doi:10.1172/JCI96273
21. Kopp BT, Zhang S, Shrestha C. Influence of CFTR Modulators on Immune Responses in Cystic Fibrosis. In: *B94. BEST OF PEDIATRICS*. American Thoracic Society; 2019:A4008-A4008. doi:10.1164/ajrccm-conference.2019.199.1\_MeetingAbstracts.A4008
22. Allen J, Sun Y, Woods JA. *Exercise and the Regulation of Inflammatory Responses*. Vol 135. 1st ed. Elsevier Inc.; 2015. doi:10.1016/bs.pmbts.2015.07.003
23. Vivodtzev I, Decorte N, Wuyam B, et al. Benefits of Neuromuscular Electrical Stimulation Prior to Endurance Training in Patients With Cystic Fibrosis and Severe Pulmonary Dysfunction. *Chest*. 2013;143(2):485-493. doi:10.1378/chest.12-0584
24. De Oliveira ACN, De Oliveira JCM, Mesquita-Ferrari RA, Damasceno N, Oliveira

- LVF, Sampaio LMM. Inflammatory process modulation in children with cystic fibrosis submitted to aerobic training. *Arch Med Sci.* 2009;5(3):422-426.
25. Nigro E, Polito R, Elce A, et al. Physical Activity Regulates TNF $\alpha$  and IL-6 Expression to Counteract Inflammation in Cystic Fibrosis Patients. *Int J Environ Res Public Health.* 2021;18(9):4691. doi:10.3390/ijerph18094691
  26. Polito R, Nigro E, Elce A, et al. Adiponectin Expression Is Modulated by Long-Term Physical Activity in Adult Patients Affected by Cystic Fibrosis. *Mediators Inflamm.* 2019;2019. doi:10.1155/2019/2153934
  27. Burton K, Morris NR, Reid D, Smith D, Kuys S. Increased physical activity post-exacerbation is associated with decreased systemic inflammation in cystic fibrosis – An observational study. *Physiother Theory Pract.* 2020;36(12):1457-1465. doi:10.1080/09593985.2019.1566942
  28. Tucker MA, Berry B, Seigler N, et al. Blood flow regulation and oxidative stress during submaximal cycling exercise in patients with cystic fibrosis. *J Cyst Fibros.* 2017. doi:10.1016/j.jcf.2017.08.015

## 2.6 Mental Health

Individuals with CF are at increased risk of depression with 10% of adolescents, 19% of adults, 37% of mothers and 31% of fathers reporting symptoms of depression [1]. In addition, 22% of adolescents, 32% of adults, 48% of mothers and 36% of fathers of patients with CF reported increased symptoms of anxiety [1]. There is growing evidence that engagement in physical activity can effectively reduce symptoms of depression and anxiety in the general population [2]. However, the role of physical activity in mental health among populations with CF is unclear.

Studies exploring the impact of physical activity on mental health among people with cystic fibrosis are clinically, methodologically, and statistically heterogeneous. The literature is variable in terms of study design, target population, and choice of outcome. Interventions are variable in terms of content, frequency, duration, and setting and intervention fidelity is rarely reported. Interventions may broadly be categorized as 1) prescribed exercise programs; 2) individually tailored programs; 3) dance; 4) mindfulness-based programs; and 5) active games. There is limited evidence for the effectiveness of prescribed exercise programs. One small randomised controlled trial of hospital based anaerobic exercise found no significant effect of intervention on emotional quality of life [3]. One small prospective study of low impact aerobic exercise [4] found no impact of intervention on wellbeing. However, a small (N=12) prospective study of aerobic and strength training combined with stretching and postural advice [5], a small (N=40) randomised trial of aerobic and strength training [6] and a small (N=14) controlled trial of resistance training [7] found a significant impact of intervention on emotional quality of life.

Two small prospective studies provide some evidence for the effectiveness of a home-based individually tailored exercise programs on emotional quality of life [8, 9]. Paranjape found positive impact of individually tailored moderate to vigorous exercise on emotional quality of life [8]. Schmidt reported small improvements in emotional quality of life following participation in exercise as selected by participants [9].

One small quasi-experimental study provides some evidence for the effectiveness of dance / movement therapy during hospital stay [10]. The 24 participants in the intervention arm showed a small but significant improvement in mood as measured by the profile of mood states question in comparison to the 10 participants in the control arm.

Three small studies have explored the impact of mindfulness based activity. One small study found that 30 minutes of tai chi at home did not result in significant improvements in emotional quality of life [11]. Another small prospective study of 11 participants found no impact of 40 minutes of yoga on anxiety and depression as measured by the hospital anxiety and depression scale and the centre for Epidemiological Studies- Depression Scale for Children. There was however, a small impact of the intervention emotional wellbeing and anxiety as measured by the Spielberger State-Trait Anxiety Inventory for Children [12]. A small prospective study of 11 participants found a significant improvement in emotional quality of life following participating in 50 minutes of yoga [13].

Two cross sectional studies explored the impact of self-reported exercise on mental health [14, 15]. These studies suggest that self reported participation in physical exercise is associated with improved psychological well-being [14] and fatigue [15].



## REFERENCES

1. Quittner, A.L., et al., Prevalence of depression and anxiety in patients with cystic fibrosis and parent caregivers: results of The International Depression Epidemiological Study across nine countries. *Thorax*, 2014. **69**: p. 1090-1097.
2. Ströhle, A., Physical activity, exercise, depression and anxiety disorders. *Journal of Neural Transmission*, 2008. **116**(6): p. 777.
3. Klijjn, P.H., et al., Effects of anaerobic training in children with cystic fibrosis: a randomized controlled study. *Chest*, 2004. **125**(4): p. 1299-1305.
4. Dunlevy, C.L., et al., Physiological and psychological effects of low-impact aerobic exercise on young adults with cystic fibrosis. *Journal of Cardiopulmonary Rehabilitation*, 1994. **14**(1): p. 47-51.
5. Urquhart, D., et al., Effects of a supervised, outpatient exercise and physiotherapy programme in children with cystic fibrosis. *Pediatric Pulmonology*, 2012. **47**(12): p. 1235-1241.
6. Rovedder, P., et al., Exercise programme in patients with cystic fibrosis: A randomized controlled trial. *Respiratory Medicine*, 2014. **108**(8): p. 1134-1140.
7. Shaw, I., et al., Individualized supervised resistance training during nebulization in adults with cystic fibrosis. *Pakistan Journal of Medical Sciences*, 2016. **32**(5): p. 1152-1157.
8. Paranjape, S.M., et al., Exercise improves lung function and habitual activity in children with cystic fibrosis. *Journal of Cystic Fibrosis*.
9. Schmidt, A.M., et al., Exercise and quality of life in patients with cystic fibrosis: A 12-week intervention study. *Physiotherapy theory and practice*, 2011. **27**(8): p. 548-556.

10. Goodill, S.W., Dance/movement therapy for adults with cystic fibrosis: Pilot data on mood and adherence. *Alternative Therapies in Health and Medicine*, 2005. **11**(1): p. 76-77.
11. Lorenc, A., et al., CF-CATS: An uncontrolled feasibility study of using tai chi for adults with cystic fibrosis. *European Journal of Integrative Medicine*, 2013. **5**(6): p. 476-486.
12. McNamara, C., et al., Yoga therapy in children with cystic fibrosis decreases immediate anxiety and joint pain. *Evidence-based Complementary and Alternative Medicine*, 2016. (9429504).
13. Ruddy, J., et al., Yoga as a therapy for adolescents and young adults with cystic fibrosis: A pilot study. *Global Advances In Health and Medicine*, 2015. **4**(6): p. 32-36.
14. Backstrom-Eriksson, L., et al., Associations between genetics, medical status, physical exercise and psychological well-being in adults with cystic fibrosis. *BMJ open respiratory research*, 2016. **3**(1): p. e000141.
15. Orava, C., et al., Fatigue and levels of physical activity in adults with cystic fibrosis: A pilot study. *Pediatric Pulmonology*, 2013. **36**: p. 362.

## **2.7 Quality of Life**

Health related quality of life (HRQoL) is a holistic concept of a person's perception of their life and is now recognised as a very important outcome measure in Cystic Fibrosis (CF) research. It has been defined as 'a multi-dimensional construct comprised of several domains as reported by the individual eg physical, social and psychological functioning, respiratory symptoms, treatment burden and body image' (1). Despite the fact that measurement of HRQoL is now increasingly being used to evaluate the effectiveness and perceived value of interventions (2), there is limited conclusive evidence as to the effects of activity and exercise on HRQoL in individuals with CF(3).

To date research investigating the impact of exercise and activity on HRQoL in individuals with CF has predominantly focussed on children (4-15) and adults (16-19) with mild to moderate disease severity. Only one study (15) included individuals with severe CF lung disease. Sample sizes in all studies are relatively small with a range of 14 (16) to 76 (12) participants. In addition a variety of outcome measures have been used with the Cystic Fibrosis questionnaire (CFQ) and the revised CFQ (CFQ-R) as the most frequently used measures with the paediatric QOL inventory (14), the SF-36 scale (18) and the quality of well-being scale also implemented (8). As a result comparison between studies is difficult. Two studies included HRQoL as a primary outcome (12, 19) with HRQoL measures in all other studies included as a secondary outcome. Few studies are therefore powered to detect significant changes in HRQoL as a result of an exercise or activity intervention. The interventions are also not focussed on interventions that may have an impact on HRQoL domains specifically. One study included exercise counselling, however this study did not report any significant change in HRQoL at the end of the study (14). Interventions were a mix of home and hospital based unsupervised and supervised exercise and activity programmes which all included tailored

aerobic and strength components. The duration of interventions also varied in length from 8 weeks to one year with the most common time period being 12 weeks.

Most studies show no improvement in HRQoL measures during the study intervention period (4, 6, 12, 16-18). Some studies have shown a non-significant impact on HRQoL but have reported a trend towards a positive change in some domains such as respiratory symptoms (10), subjective health perception (11) and physical functioning (13). Four studies (7-9, 19) have shown a statistically significant positive effect on a variety of HRQoL domains including well-being (8), treatment burden and emotional functioning (19), physical, emotional, social, body, treatment and respiratory symptoms (9) and overall HRQoL score (7). However these four studies all differ in duration and intervention type so specific reasons for improvements in HRQoL are difficult to ascertain.

In summary there is some weak evidence of impact of exercise and activity on some HRQoL domains in individuals with mild to moderate CF in the short term, however there is significant heterogeneity in the methodologies and results.

## **REFERENCES**

1. Abbott J. Health-related quality of life measurement in cystic fibrosis: advances and limitations. *Chron Respir Dis.* 2009;6(1):31-41.
2. Royce FH, Carl JC. Health-related quality of life in cystic fibrosis. *Curr Opin Pediatr.* 2011;23(5):535-40.
3. Radtke T, Nevitt SJ, Hebestreit H, Kriemler S. Physical exercise training for cystic fibrosis. *Cochrane Database Syst Rev.* 2017;11:CD002768.

4. Santana Sosa E, Groeneveld IF, Gonzalez-Saiz L, Lopez-Mojares LM, Villa-Asensi JR, Barrio Gonzalez MI, et al. Intrahospital weight and aerobic training in children with cystic fibrosis: a randomized controlled trial. *Med Sci Sports Exerc.* 2012;44(1):2-11.
5. Santana-Sosa E, Gonzalez-Saiz L, Groeneveld IF, Villa-Asensi JR, Barrio Gomez de Agüero MI, Fleck SJ, et al. Benefits of combining inspiratory muscle with 'whole muscle' training in children with cystic fibrosis: a randomised controlled trial. *Br J Sports Med.* 2014;48(20):1513-7.
6. Hommerding PX, Baptista RR, Makarewicz GT, Schindel CS, Donadio MV, Pinto LA, et al. Effects of an educational intervention of physical activity for children and adolescents with cystic fibrosis: a randomized controlled trial. *Respir Care.* 2015;60(1):81-7.
7. Gupta S, Mukherjee A, Lodha R, Kabra M, Deepak KK, Khadgawat R, et al. Effects of Exercise Intervention Program on Bone Mineral Accretion in Children and Adolescents with Cystic Fibrosis: A Randomized Controlled Trial. *Indian J Pediatr.* 2019;86(11):987-94.
8. Selvadurai HC, Blimkie CJ, Meyers N, Mellis CM, Cooper PJ, Van Asperen PP. Randomized controlled study of in-hospital exercise training programs in children with cystic fibrosis. *Pediatr Pulmonol.* 2002;33(3):194-200.
9. Urquhart D, Sell Z, Dhouieb E, Bell G, Oliver S, Black R, et al. Effects of a supervised, outpatient exercise and physiotherapy programme in children with cystic fibrosis. *Pediatr Pulmonol.* 2012;47(12):1235-41.
10. Del Corral T, Cebria IIMA, Lopez-de-Uralde-Villanueva I, Martinez-Alejos R, Blanco I, Vilaro J. Effectiveness of a Home-Based Active Video Game Programme in Young Cystic Fibrosis Patients. *Respiration.* 2018;95(2):87-97.
11. Hebestreit H, Kieser S, Junge S, Ballmann M, Hebestreit A, Schindler C, et al. Long-term effects of a partially supervised conditioning programme in cystic fibrosis. *Eur Respir J.* 2010;35(3):578-83.

12. Hebestreit H, Schmid K, Kieser S, Junge S, Ballmann M, Roth K, et al. Quality of life is associated with physical activity and fitness in cystic fibrosis. *BMC Pulm Med.* 2014;14:26.
13. Klijn PH, Oudshoorn A, van der Ent CK, van der Net J, Kimpen JL, Helders PJ. Effects of anaerobic training in children with cystic fibrosis: a randomized controlled study. *Chest.* 2004;125(4):1299-305.
14. Moola FJ, Garcia E, Huynh E, Henry L, Penfound S, Consunji-Araneta R, et al. Physical Activity Counseling for Children With Cystic Fibrosis. *Respir Care.* 2017;62(11):1466-73.
15. Ledger SJ, Owen E, Prasad SA, Goldman A, Willams J, Aurora P. A pilot outreach physiotherapy and dietetic quality improvement initiative reduces IV antibiotic requirements in children with moderate-severe cystic fibrosis. *J Cyst Fibros.* 2013;12(6):766-72.
16. Beaudoin N, Bouvet GF, Coriati A, Rabasa-Lhoret R, Berthiaume Y. Combined Exercise Training Improves Glycemic Control in Adult with Cystic Fibrosis. *Med Sci Sports Exerc.* 2017;49(2):231-7.
17. Ward N, Stiller K, Rowe H, Morrow S, Morton J, Greville H, et al. Airway clearance by exercising in mild cystic fibrosis (ACE-CF): A feasibility study. *Respir Med.* 2018;142:23-8.
18. Rovedder PM, Flores J, Ziegler B, Casarotto F, Jaques P, Barreto SS, et al. Exercise programme in patients with cystic fibrosis: a randomized controlled trial. *Respir Med.* 2014;108(8):1134-40.
19. Schmidt AM, Jacobsen U, Bregnballe V, Olesen HV, Ingemann-Hansen T, Thastum M, et al. Exercise and quality of life in patients with cystic fibrosis: A 12-week intervention study. *Physiother Theory Pract.* 2011;27(8):548-56.

### **3. Measurement of Physical Activity and Exercise**

#### **3.1 Physical Activity Measurement**

Physical activity (PA) is particularly broad and complex to measure [1], with the recent holistic definition encompassing both movement *and* the context [2]. Subjective methods, such as questionnaires, diaries and log-books, are low-cost and feasible to implement and can provide an indication of the quantity *and* context of PA. However, self-report methods are susceptible to recall bias [3], low validity [4], low accuracy for measuring different intensities [5, 6], and are usually limited by factors such as age, the complexity of questions, and health status. As such, questionnaires have only been recommended as a secondary outcome measure in cystic fibrosis (CF) [7].

Device-based methods, such as pedometers and accelerometers, are capable of measuring movement or energy expended [1, 8, 9]. Pedometers, which measure vertical acceleration, are easy to use and low-cost, but are designed to measure activities such as walking and running and can only provide an indication of volume (i.e. number of steps), rather than PA intensities and patterns [10]. Alternatively, accelerometers, the most popular tool to measure PA in clinical populations, have been shown to assess PA intensities in a reliable manner [1, 8, 11-13]. Therefore, where possible, device-based assessment should be used for individuals with CF. Indeed, the most recent position statement recommended the ActiGraph accelerometer given its clinometric properties (reliability, validity, and responsiveness), but, in the absence of robust devices, the Habitual Activity Estimation Scale should be used [7, 14]. Nonetheless, the processing decisions surrounding accelerometry remain subjective, from selecting the sampling frequency [15], wear-time criteria [16] and type of data (i.e. raw vs. pre-processed) [17], to the translation of acceleration into PA patterns and intensities, such as moderate-to-vigorous physical activity [MVPA; 16, 17]. Whilst traditional methods such as cut-points and

prediction equations have been used to assess PA levels and energy expenditure in the CF population [18-20], highly accurate machine learning approaches are now being utilised in clinical populations [21-23]. The use of machine learning is facilitated by the availability of open-source algorithms that can be tailored for specific populations [24].

It is pertinent to note that prediction equations, cut-points, and machine learning models are population-specific and can lead to inaccuracies in PA intensities and energy expenditure when applied to a different population [25, 26]. This is particularly important given the higher energetic demands characteristic of those with CF [27-29], though the long-term effects of recent advances in moderators may render this largely redundant. It is therefore imperative that accelerometry data-processing techniques are developed from CF populations. Indeed, the CF-specific prediction equations [26], cut-points [30] and machine learning models [31] developed for children were considerably different to ones developed for the general population, which may explain findings which reported that those with CF spent less time in MVPA and more in light PA than their peers [19, 20]. Nonetheless, such work remains in its infancy. The development of CF-specific measurements of PA is fundamental to enhance our understanding of the relationship between PA and health, and subsequently inform interventions and recommendations in this population.

## **REFERENCES**

1. Matthews CE, Hagströmer M, Pober DM, Bowles HR. Best Practices for Using Physical Activity Monitors in Population-Based Research. *Medicine and science in sports and exercise*. 2012;44(1 Suppl 1).
2. Piggin J. What Is Physical Activity? A Holistic Definition for Teachers, Researchers and Policy Makers. *Frontiers in Sports and Active Living*. 2020;2(72).



3. Trost SG, O'Neil M. Clinical use of objective measures of physical activity. *Br J Sports Med.* 2014;48(3):178-81.
4. Rangul V, Holmen TL, Kurtze N, Cuypers K, Midthjell K. Reliability and validity of two frequently used self-administered physical activity questionnaires in adolescents. *BMC medical research methodology.* 2008;8:47.
5. Pierce MJ-K, James FS, Elizabeth AG, Cheryl LR, John P. Comparative validation of the IPAQ and the 7-Day PAR among women diagnosed with breast cancer. *International Journal of Behavioral Nutrition and Physical Activity.* 2006;3(1):7.
6. Richardson MT, Ainsworth BE, Jacobs DR, Leon AS. Validation of the Stanford 7-day recall to assess habitual physical activity. *Annals of epidemiology.* 2001;11(2):145-53.
7. Bradley J, O'Neill B, Kent L, Hulzebos EH, Arets B, Hebestreit H. Physical activity assessment in cystic fibrosis: A position statement. *Journal of cystic fibrosis : official journal of the European Cystic Fibrosis Society.* 2015;14(6):e25-32.
8. Sylvia LG, Bernstein EE, Hubbard JL, Keating L, Anderson EJ. Practical guide to measuring physical activity. *J Acad Nutr Diet.* 2014;114(2):199-208.
9. Ainsworth BE. How do I measure physical activity in my patients? Questionnaires and objective methods. *Br J Sports Med.* 2009;43(1):6-9.
10. Bassett DR, Toth LP, LaMunion SR, Crouter SE. Step Counting: A Review of Measurement Considerations and Health-Related Applications. *Sports Med.* 472017. p. 1303-15.
11. Arvidsson D, Fridolfsson J, Börjesson. Measurement of Physical Activity in Clinical Practice Using Accelerometers. *Journal of internal medicine.* 2019;286(2).
12. Lipert A, Jegier A. Comparison of Different Physical Activity Measurement Methods in Adults Aged 45 to 64 Years Under Free-Living Conditions. *Clin J Sport Med.* 2017;27(4):400-8.

13. Patterson R, McNamara E, Tainio M, de Sá TH, Smith AD, Sharp SJ, et al. Sedentary behaviour and risk of all-cause, cardiovascular and cancer mortality, and incident type 2 diabetes: a systematic review and dose response meta-analysis. *Eur J Epidemiol.* 332018. p. 811-29.
14. John AH, Brock U, John C. Development of the Habitual Activity Estimation Scale for Clinical Research: A Systematic Approach. *Pediatric Exercise Science.* 2006;18(2):193-202.
15. Troiano RP, McClain JJ, Brychta RJ, Chen KY. Evolution of accelerometer methods for physical activity research. *Br J Sports Med.* 2014;48(13):1019-23.
16. Welk GJ. Principles of design and analyses for the calibration of accelerometry-based activity monitors. *Med Sci Sports Exerc.* 2005;37(11 Suppl):S501-11.
17. Farrahi V, Niemelä M, Kangas M, Korpelainen R, Jämsä T. Calibration and Validation of Accelerometer-Based Activity Monitors: A Systematic Review of Machine-Learning Approaches. *Gait & posture.* 2019;68.
18. Cox NS, Alison JA, Button BM, Wilson JW, Morton JM, Holland AE. Physical activity participation by adults with cystic fibrosis: An observational study. *Respirology.* 2016;21(3):511-8.
19. Aznar S, Gallardo C, Fiuza-Luces C, Santana-Sosa E, López-Mojares LM, Santalla A, et al. Levels of moderate--vigorous physical activity are low in Spanish children with cystic fibrosis: a comparison with healthy controls. *Journal of cystic fibrosis : official journal of the European Cystic Fibrosis Society.* 2014;13(3):335-40.
20. Mackintosh KA, Ridgers ND, Evans RE, McNarry MA. Physical Activity and Sedentary Time Patterns in Children and Adolescents With Cystic Fibrosis and Age- and Sex-Matched Healthy Controls. *J Phys Act Health.* 2018;15(2):82-8.

21. Ahmadi MN, Chowdhury A, Pavey T, Trost SG. Laboratory-based and free-living algorithms for energy expenditure estimation in preschool children: A free-living evaluation. *PLoS One*. 2020.
22. Doherty MW, Sven H, Louis A, Chris H, Aiden. Statistical machine learning of sleep and physical activity phenotypes from sensor data in 96,220 UK Biobank participants. *Scientific Reports*. 2018;8(1):7961.
23. Fergus P, Hussain A, Hearty J, Fairclough S, Boddy L, Mackintosh KA, et al., editors. *A Machine Learning Approach to Measure and Monitor Physical Activity in Children to Help Fight Overweight and Obesity* 2015; Cham: Springer International Publishing.
24. Ahmadi MN, Pavey TG, Trost SG. Machine Learning Models for Classifying Physical Activity in Free-Living Preschool Children. *Sensors (Basel)*. 2020;20(16):4364.
25. Serra MC, Balraj E, DiSanzo BL, Ivey FM, Hafer-Macko CE, Treuth MS, et al. Validating accelerometry as a measure of physical activity and energy expenditure in chronic stroke. *Topics in Stroke Rehabilitation*. 2017;24(1):18-23.
26. Stephens S, Takken T, Esliger DW, Pullenayegum E, Beyene J, Tremblay M, et al. Validation of Accelerometer Prediction Equations in Children With Chronic Disease. *Pediatric exercise science*. 2016;28(1).
27. Ramsey BW, Farrell PM, Pencharz P. Nutritional assessment and management in cystic fibrosis: a consensus report. The Consensus Committee. *Am J Clin Nutr*. 1992;55(1):108-16.
28. Bandini LG, Schoeller DA, Fukagawa NK, Wykes LJ, Dietz WH. Body composition and energy expenditure in adolescents with cerebral palsy or myelodysplasia. *Pediatr Res*. 1991;29(1):70-7.
29. Epstein LH, Wing RR, Cluss P, Fernstrom MH, Penner B, Perkins KA, et al. Resting metabolic rate in lean and obese children: relationship to child and parent weight and percent-overweight change. *The American Journal of Clinical Nutrition*. 1989;49(2):331-6.

30. Bianchim MS, McNarry MA, Evans R, Thia L, Barker AR, Williams CA, et al. Calibration and Cross-validation of Accelerometry in Children and Adolescents with Cystic Fibrosis. Unpublished Manuscript. 2021.
31. Bianchim MS, McNarry MA, Barker AR, Williams CA, Denford S, Thia L, et al. A Machine Learning Approach for Physical Activity Recognition in Cystic Fibrosis. Manuscript under review. 2021.

### **3.2 Measurement of Exercise**

Annual review exercise testing is recommended for those with Cystic Fibrosis (CF). Indeed, given the recent advances in modulator therapies and associated health and wellbeing of those with CF, exercise testing has arguably never been so important. The improvements in overall health do, however, have implications regarding exercise test selection, with more demanding tests now potentially feasible, and advocated, in a wider range of people.

Aligned with the predominant clinical focus, the assessment of aerobic fitness is considered here. However, the merits of, and need for, more holistic assessments of exercise capacity, including strength and anaerobic fitness, are increasingly recognised [1]. Indeed, there are numerous options for the measurement of exercise capacity in those with CF; the selection of which is most appropriate is dependent on i) participant-level factors, e.g. age, disease severity/progression and the presence of comorbidities; ii) centre-level factors, e.g. availability of exercise equipment, cost and space; and iii) the purpose of conducting the test, e.g. as a general assessment of exercise capacity or seeking to identify a specific cause(s) of exercise intolerance [1].

The “gold-standard” and internationally recommended method of assessment of cardiorespiratory fitness is a cardiopulmonary exercise test (CPET) to volitional exhaustion to determine peak oxygen uptake [2, 3]. CPETs offer insights into the integrated cardiovascular, respiratory and metabolic determinants of exercise (dys)function [4] and are perceived as highly beneficial by patients for their diagnostic assessment [3]. In situations where it is unclear whether a maximal effort was provided, a supra-maximal validation bout is recommended and has been reported to be safe and well-tolerated [5]. Whilst peak oxygen uptake is associated with prognosis [6], it may lack sensitivity or specificity to reflect changes in disease

progression or intervention effectiveness, especially in more well people. In recognition of this limitation, submaximal responses are increasingly being considered. For example, the oxygen uptake efficiency slope has been reported to be reliable, easily determined in comparison to parameters such as the gas exchange threshold and effort-independent [7]. Furthermore, the coordination of the dynamic responses of the cardiovascular, pulmonary and metabolic systems to the onset of constant work rate exercise has been suggested to provide a sensitive indication regarding the mechanism(s) of exercise intolerance [8] and warrants further attention.

Alternative, or complementary, exercise tests to the CPET for which appropriate evidence is available regarding their validity, reliability and clinimetric properties include the modified shuttle test, six minute walk test, three minute step test, modified step test and one minute sit-to-stand test [1]. These field-based tests are less expensive and more portable but due to their volitional and often submaximal nature (especially in more well people) and less precise outcomes, they provide less insight to the underlying cause(s) for exercise intolerance [4]. Nonetheless, given limitations regarding the availability of specialist laboratory facilities, equipment and staff to undertake CPETs, field-based tests may provide useful indications of functional ability. No single test is suitable for all clinical needs; the most appropriate test must be determined in terms of quality, utility, and psychometric properties [9].

## REFERENCES

1. Saynor, Z.L., et al., *Multimodal exercise testing in cystic fibrosis: translating research into more standardised global clinical practice*. In Preparation.
2. Hebestreit, H., et al., *Statement on Exercise Testing in Cystic Fibrosis*. *Respiration*, 2015. **90**(4): p. 332-351.

3. Radtke, T., et al., *ERS statement on standardisation of cardiopulmonary exercise testing in chronic lung diseases*. European Respiratory Review, 2019. **28**(154): p. 180101.
4. Urquhart, D.S. and Z.L. Saynor, *Exercise testing in cystic fibrosis: Who and why?* Paediatric Respiratory Reviews, 2018. **27**: p. 28-32.
5. Causer, A.J., et al., *Cardiopulmonary exercise testing with supramaximal verification produces a safe and valid assessment of  $\dot{V}O_{2max}$  in people with cystic fibrosis: a retrospective analysis*. J Appl Physiol (1985), 2018. **125**(4): p. 1277-1283.
6. Vendrusculo, F.M., et al., *Peak Oxygen Uptake and Mortality in Cystic Fibrosis: Systematic Review and Meta-Analysis*. Respir Care, 2018: p. respcare.06185.
7. Gruet, M., et al., *Clinical utility of the oxygen uptake efficiency slope in cystic fibrosis patients*. J Cyst Fibros, 2010. **9**(5): p. 307-13.
8. Saynor, Z.L., et al., *Impaired Pulmonary  $VO_2$  kinetics in Cystic Fibrosis Depend on Exercise Intensity*. Medicine and Science in Sports and Exercise, 2016. **48**(11): p. 2090-2099.
9. Lang, R.L., et al., *Exercise testing for children with cystic fibrosis: A systematic review*. Pediatric Pulmonology, 2020. **55**(8): p. 1996-2010.

## **4. Prescription of Physical Activity and Exercise**

### **4.1 Training Modes and Styles**

The *optimal* mode of exercise training for people with CF largely depends on the goals of the patient and should be individually prescribed and varied in order to maximize long-term participation. As discussed previously, there is conflicting evidence from RCTs that regular continuous aerobic exercise training undertaken at a moderate intensity, and strength training can elicit improvements in lung function (FEV<sub>1</sub>) in adolescents and adults with CF (1), and stronger evidence that aerobic training elicits improvements in markers of exercise capacity. Strength training alone is unlikely to be sufficient to produce improvements in exercise capacity, particularly in trained adults and children (2). The benefits of exercise have also been discussed previously, but perhaps the most noteworthy reason is to improve maximal exercise capacity, due to associations between this measure and mortality in people with CF (3).

Numerous RCTs have investigated modes of aerobic exercise of ~30 to 60 minutes of walking, running, cycling or mixed exercise at a moderate intensity or higher (i.e., 50% of VO<sub>2peak</sub> or 60 to 85% of peak heart rate) (4). Habitual physical activity, including light intensity exercise, is unlikely to produce sufficient benefits in exercise capacity (5), though further investigation of the benefits of light intensity exercise in people with CF may be warranted.

Preliminary data supports the tolerability, feasibility, and initial effectiveness of interval-based training (6–9). This mode may be optimal compared to continuous moderate intensity aerobic exercise in circumstances where a person is unable to sustain continuous exercise for a sufficient length of time to elicit physiological adaptations in skeletal muscle (i.e., severe respiratory disease) (7). In addition to the benefits on symptoms (alleviation of dyspnoea and muscle fatigue during the ‘rest’ phases), high intensity interval training (HIIT) may reduce the



total exercise time, as people are able to achieve a higher total work intensity than they may possible during continuous exercise training (8). An early case study prescribed a training frequency of thrice weekly for 6 weeks in a young female with CF. Sessions consisted of 10 to 20 intervals involving 30 seconds of ‘work’ (50 to 90% maximal exercise capacity) interspersed with 60 seconds of active ‘rest’ (25%). Two small RCTs published in 2020 investigated the effects of HIIT in adults; one involved 45 minutes of biweekly interval-based training (with or without supplemental oxygen) for 8 weeks (70% of  $W_{peak}$  interspersed with 60 seconds of recovery at 35%)(9); another investigated 8 weeks of low-volume HIIT comprising 3 sessions per week and 10 minutes per session (30-seconds of ‘work’ [symptom limited] interspersed with 30-seconds of active ‘rest’; 2-minute warm-up and cool-down) compared to no exercise (8). Others have compared the effects of HIIT to continuous exercise in people with moderate to severe disease, and found comparable effects on markers of exercise capacity (i.e.  $W_{peak}$ ) (7). Supervised interval-based training may be considered in the inpatient (7), outpatient (10) and community-based setting (6).

Comprehensive routines may also include plyometric, load bearing exercises to optimize bone mineral density and flexibility exercise (11,12).

## REFERENCES

1. Kriemler S, Kieser S, Junge S, Ballmann M, Hebestreit A, Schindler C, Stüssi C, Hebestreit H. Effect of supervised training on FEV1 in cystic fibrosis: a randomised controlled trial. *J Cyst Fibros*. 2013 Dec;12(6):714-20. doi: 10.1016/j.jcf.2013.03.003. Epub 2013 Apr 13. PMID: 23588193.

2. Orenstein DM, Hovell MF, Mulvihill M, Keating KK, Hofstetter CR, Kelsey S, Morris K, Nixon PA. Strength vs aerobic training in children with cystic fibrosis: a randomized controlled trial. *Chest*. 2004 Oct 1;126(4):1204-14.
3. Hebestreit H, Hulzebos EH, Schneiderman JE, Karila C, Boas SR, Kriemler S, Dwyer T, Sahlberg M, Urquhart DS, Lands LC, Ratjen F. Cardiopulmonary exercise testing provides additional prognostic information in cystic fibrosis. *American journal of respiratory and critical care medicine*. 2019 Apr 15;199(8):987-95.
4. Radtke T, Nevitt SJ, Hebestreit H, Kriemler S. Physical exercise training for cystic fibrosis. *Cochrane Database of Systematic Reviews*. 2017(11).
5. Hebestreit H, Arets HG, Aurora P, Boas S, Cerny F, Hulzebos EH, Karila C, Lands LC, Lowman JD, Swisher A, Urquhart DS. Statement on exercise testing in cystic fibrosis. *Respiration*. 2015;90(4):332-51.
6. Hulzebos HJ, Snieder H, van der Et J, Helders PJ, Takken T. High-intensity interval training in an adolescent with cystic fibrosis: a physiological perspective. *Physiotherapy theory and practice*. 2011 Apr 1;27(3):231-7.
7. Gruber W, Orenstein DM, Braumann KM, Beneke R. Interval exercise training in cystic fibrosis—effects on exercise capacity in severely affected adults. *Journal of Cystic Fibrosis*. 2014 Jan 1;13(1):86-91.
8. Sawyer A, Cavalheri V, Jenkins S, Wood J, Cecins N, Bear N, Singh B, Gucciardi D, Hill K. High-Intensity Interval Training Is Effective at Increasing Exercise Endurance Capacity and Is Well Tolerated by Adults with Cystic Fibrosis. *Journal of clinical medicine*. 2020 Oct;9(10):3098.
9. Reuveny R, DiMenna FJ, Gunaratnam C, Arad AD, McElvaney GN, Susta D, Peled M, Moyna NM. High-intensity interval training accelerates oxygen uptake kinetics and

improves exercise tolerance for individuals with cystic fibrosis. *BMC Sports Science, Medicine and Rehabilitation*. 2020 Dec;12:1-3.

10. Kaltsakas G, Chynkiamis N, Anastasopoulos N, Zeliou P, Karapatoucha V, Kotsifas K, Diamantea F, Inglezos I, Koulouris NG, Vogiatzis I. Interval versus constant-load exercise training in adults with Cystic Fibrosis. *Respiratory Physiology & Neurobiology*. 2021.288:103643.
11. García ST, Sánchez MA, Cejudo P, Gallego EQ, Dapena J, Jiménez RG, Luis PC, de Terreros IG. Bone health, daily physical activity, and exercise tolerance in patients with cystic fibrosis. *Chest*. 2011 Aug 1;140(2):475-81.
12. Gupta S, Mukherjee A, Lodha R, Kabra M, Deepak KK, Khadgawat R, Talwar A, Kabra SK. Effects of exercise intervention program on bone mineral accretion in children and adolescents with cystic fibrosis: a randomized controlled trial. *The Indian Journal of Pediatrics*. 2019 Nov;86(11):987-94.

## 4.2 Adherence

Habitual physical activity across the lifespan is important for everyone for optimal health and well-being. A key finding from the evidence is the generally low uptake of physical activity among children and young people, which is also reflected among those living with cystic fibrosis [1,2]. Most adults with CF have been shown to achieve recommended daily physical activity levels during clinical trials, but longer-term adherence is unknown [3].

Education about the benefits of exercise may be important in promoting adherence to regular exercise across the lifespan in CF [4,5]. Regular exercise of moderate intensity and duration has been shown to exert anti-inflammatory effects and immune cell activation associated with reduced disease incidence and viral infection susceptibility in CF [6]. Education presented in an engaging form describing different intensities of exercise and heart rate targets for age can create a collaborative way of developing a personalised exercise program for adults with CF [7, 8].

Part of the process of encouraging patients with CF to engage in regular exercise is assisting them in identifying their barriers and enablers to activity participation [9]. Activity diaries and modern exercise tracking devices such as pedometers, Smart phones and wrist devices measuring step counts, distance walked or run may be useful in terms of assessing and tracking exercise levels and may act as enablers to regular exercise programs [10,11].

To promote adherence to regular exercise a personalised approach using motivational interviewing that involves enhancing a patient's motivation to overcome barriers and engage in positive change may be useful. This includes understanding the patient with CF's own motivations, interests and preferences; listening with empathy and empowering the person. Within MI the therapist is viewed as a facilitator rather than an expert, who adopts a

nonconfrontational approach to guide the patient towards change. The overall spirit of MI has been described as collaborative, evocative and honouring of patient autonomy [12, 13].

Within the context of living with cystic fibrosis poverty of time is one of the most commonly reported barriers to habitual exercise [14, 15]. Opportunities to combine physical activity perceived to be enjoyable with other valued activities – removing the need to choose between one or the other. For example, doing something active with friends or family, or making friends in a team sport or exercise class or use of active digital technology may enable more regular exercise[16].

Building healthy habits by introducing a regular routine of physical activity, may reduce the need for relying on motivation as the behaviour becomes more habitual and automatic. Habit formation requires consistent repetition of an action in the same context. To make a new healthy activity habit may take some planning in advance. Over time this requires much less effort than actively needing to motivate oneself to do something [17].

## **REFERENCES**

1. Prasad SA, Cerny FJ. Factors that influence adherence to exercise and their effectiveness. Application to cystic fibrosis. *Pediatric Pulmonology* 2002; Volume 34, (1):66-72.
2. Kettler LJ, Sawyer SM, Winefield HR, Greville HW. Determinants of adherence in adults with cystic fibrosis. *Thorax* 2002;57:356-464.
3. Cox NS, Alison JA, Button BM, Wilson JW, Morton JM, Holland AE. Physical activity participation by adults with cystic fibrosis: An observational study. *Respirology* 2016;21:511-518.

4. Schneiderman-Walker J, Wilkes DL, Strug L et al. Sex differences in habitual physical activity and lung function decline in children with cystic fibrosis. *Journal of Pediatrics* 2005;147:321-326.
5. Yankaskas JR, Marshall BC, Sufian B, Simon RH, Rodman D. Cystic Fibrosis Adult Care. *Chest* 2004;125:1S to 39S.
6. Van de Weert-van Leeuwen P, Arets H, van der Ent C, Beekman J. Infection, inflammation and exercise in cystic fibrosis. *Respir Res* 2013, 14(1): 32. Published online 2013 Mar 6 doi: 10.1186/1465-9921-14-32.
7. Fox 111, Sm, Naughton JP and Haskell WL. Physical activity and the prevention of coronary heart disease. *Ann Clin Res* 1971;3:404-32.
8. Hareenden J, Leidy NK, Monz BU, Winnette R, Becker K, Mahler DA, Proposing a standardized method for evaluating patient report of the intensity of dyspnea during exercise testing in COPD. *International Journal of COPD* 2012; 7:345-355.
9. Owen EK, John RM. Overcoming Barriers to Treatment Adherence in Adolescents with Cystic Fibrosis: A Systematic Review. *Journal of Pediatrics and Neonatal Care* 2016;5(6):204-213.
10. Savi D, Graziano L, Elborn S. New strategies of physical activity assessment in cystic fibrosis: a pilot study. *BMC Pulmonary Medicine* 2020: 20;285.
11. Bravata DM, Smith-Spangler C, Sundaram V, Gienger AL, Lin N, Lewis R et al. Using pedometers to increase physical activity and improve health: a systematic review. *JAMA* 2007;298:2296-304.
12. Rubak S, Sandbaek A, Lauritzen T, Christensen B. Motivational interviewing: a systematic review and meta-analysis. *British Journal of General Practice*. 2005;55(513):305-12.

13. Duff AJ, Latchford GJ. Motivational interviewing for adherence problems in cystic fibrosis. *Pediatric Pulmonology*. 2010;45(3):211-20.
14. White D, Stiller K, Haensel. Adherence of adult cystic fibrosis patients with airway clearance and exercise regimens. *Journal of Cystic Fibrosis* 2007;6:163-170.
15. Modi AC, Quittner AL. Barriers to Treatment Adherence for Children with Cystic Fibrosis and Asthma: What Gets in the Way? *Journal of Pediatric Psychology* 2006;31(8):846-858.
16. Calthorpe RJ, Smith S, Gathercole K, Smyth AR. Using digital technology for home monitoring, adherence and self management in cystic fibrosis: a state of the art review. *Thorax* 2020;75:72-77.
17. Sawicki GS, Heller KS, Demars N, Robinson WM. Motivating Adherence Among Adolescents With Cystic Fibrosis. *Pediatric Pulmonology* 2015;50:127-136.

### **4.3 Staffing in Clinical Practice**

Physical activity (PA) and exercise are integral to the overall management of individuals with CF, as such it is recommended that CF services should include the assessment of exercise capacity, the prescription and monitoring of exercise programmes, PA education, support and promotion in both in-patient and out-patients settings, irrespective of age and disease severity [1][2][3]. The responsibility for delivering such services is typically incorporated into CF physiotherapy services [1][4].

There are currently no guidelines for the staffing or training requirements for the provision of exercise in CF care. The gold standard exercise testing recommended annually for individuals with CF is CPET. It is recommended that two members of staff are present, with appropriate training and experience to perform the test, recognise adverse events, respond to emergencies and be aware of CF specific infection control guidelines [5].

Physiotherapy training does not currently include conducting or interpreting CPETs or the subsequent prescription of exercise. This highlights a requirement for CPD opportunities for physiotherapists in this area and/or the potential role of clinical exercise physiologists (or equivalent allied health professionals (AHP) in CF care. In those areas where CPET is not available, the delivery of alternative exercise testing should be encouraged and the prescription and monitoring of exercise programmes could be undertaken by appropriately trained and experienced healthcare professionals.

It has recently been demonstrated that the incorporation of an AHP capable of completing clinical tasks relating to exercise testing and prescription within a CF physiotherapy service



can positively impact physiotherapist's scope of practice, allowing more time for complex clinical care, management duties and research activity [6].

There is an increasing presence of exercise professionals working in healthcare and although training, roles, responsibilities and titles vary internationally there are now accreditation programmes available for clinical exercise physiologists in the United States [7], Canada [8] and Australia [9]. Clinical exercise physiologists are defined as “allied health professionals” specialising in the delivery of scientific exercise interventions for people with acute, subacute, or chronic medical conditions across a wide spectrum of health, including but not limited to cardiovascular, respiratory, endocrine, musculoskeletal, mental and neurological disease” [10]. Whilst there are examples of accredited clinical exercise physiologists working as independent practitioners with clinical populations there are few examples of this in CF care. Similar accreditation programmes are not yet available in the United Kingdom or Europe although there are examples of exercise professionals working as physiotherapy assistants or in similar roles [11]. The educational, training and experience requirements for clinical exercise physiologists working in CF are not yet standardised. Similarly, the roles, responsibilities and competency requirements remain largely undefined. Such roles will likely require a degree level qualification in sports and exercise sciences or a related field and where possible accreditation and registration with an appropriate body upholding standards of care.

Based on the current UK and Australian recommendations for physiotherapy staffing requirements in CF services (2 Physiotherapists per 50-75 pwCF) [4,12] it is feasible that a full-time (1.0 whole-time equivalent [WTE]) AHP such as an appropriately trained and experienced ‘Clinical Exercise Physiologist’ could provide exercise services for cohorts of ~150 patients. It should be noted that these staffing ratios may not be appropriate for all CF

clinical areas and more staff may well be required. There may be scope for individuals in lower salary grades, such as exercise professionals without an undergraduate degree (e.g. ‘exercise technician’, akin to a ‘support worker’) to assist a full-time AHP in larger centres (~250 patients), and it is likely that additional exercise support (0.5 WTE) is necessary for every increase of 75 patients thereafter in centres with more than 250 patients. In smaller centres (~75 patients) the provision of exercise could feasibly be delivered by an exercise professional on a 0.5.WTE contract or by an appropriately trained and experienced physiotherapist.

## REFERENCES

- [1] National Institute for Health and Care Excellence (NICE), “Cystic fibrosis: diagnosis and management guideline. [www.nice.org.uk/guidance/ng78](http://www.nice.org.uk/guidance/ng78),” no. October 2017, 2017.
- [2] C. Castellani *et al.*, “ECFS best practice guidelines: the 2018 revision,” *J. Cyst. Fibros.*, vol. 17, no. 2, pp. 153–178, 2018.
- [3] B. M. Button *et al.*, “Physiotherapy for cystic fibrosis in Australia and New Zealand: A clinical practice guideline,” *Respirology*, vol. 21, no. 4, pp. 656–667, 2016.
- [4] Cystic Fibrosis Trust, “Standards of Care and Good Practice for the Physiotherapy Management of Cystic Fibrosis (2020),” no. November, pp. 160–162, 2020.
- [5] H. Hebestreit *et al.*, “Statement on exercise testing in cystic fibrosis,” *Respiration*, vol. 90, no. 4, pp. 332–351, 2015.
- [6] K. Hall *et al.*, “Physiotherapy service provision in a specialist adult cystic fibrosis service: A pre-post design study with the inclusion of an allied health assistant,” *Chron. Respir. Dis.*, vol. 18, p. 147997312110178, 2021.
- [7] A. H. Bowersock, W. A. Breeding, and C. A. Sheppard, “Hiring Practices of Exercise Physiologist in Cardiac Rehabilitation Programs among Mid-Atlantic States in the United States,” *J. Clin. Exerc. Physiol.*, vol. 5, no. 3, pp. 32–36, 2016.

- [8] D. E. R. Warburton, S. A. Charlesworth, H. J. A. Foulds, D. C. McKenzie, R. J. Shephard, and S. S. D. Bredin, "Qualified exercise professionals: Best practice for work with clinical populations," *Can. Fam. Physician*, vol. 59, no. 7, pp. 759–761, 2013.
- [9] N. A. Smart, A. Williams, and K. Lyndon, "The Role and Scope of Accredited Exercise Physiologists in the Australian Healthcare System," *J. Clin. Exerc. Physiol.*, vol. 5, no. 2, pp. 16–20, 2016.
- [10] A. Pearce and G. Longhurst, "The role of the clinical exercise physiologist in reducing the burden of chronic disease in new zealand," *Int. J. Environ. Res. Public Health*, vol. 18, no. 3, pp. 1–13, 2021.
- [11] O. W. Tomlinson, J. Shelley, S. Denford, A. R. Barker, P. J. Oades, and C. A. Williams, "Promotion of exercise in the management of cystic fibrosis - summary of national meetings," *Eur. J. Pers. Centered Healthc.*, 2018.
- [12] [https://www.thoracic.org.au/journal-publishing/command/download\\_file/id/20/filename/CF\\_standards\\_of\\_care\\_Australia\\_2008.pdf](https://www.thoracic.org.au/journal-publishing/command/download_file/id/20/filename/CF_standards_of_care_Australia_2008.pdf)

#### **4.4 Telehealth**

Telehealth is the delivery of care via any electronic means when the patient and healthcare professional are separated by distance. This encompasses multiple modalities, including telephone and video-calls, emails, and text messaging, to support diagnoses, monitoring and therapeutic interventions [1]. To date, use of telehealth has been limited in CF, for example, it has been utilised for remote consultations [2], monitoring for detection of exacerbations [3] and preparation for transplantation [4]. The application of telehealth in CF has been systematically reviewed once [5], although heterogeneity in the interventions implemented and outcomes used currently make it difficult to identify the true efficacy of telehealth within CF management.

In relation to exercise testing, videoconferencing has been utilised to remotely monitor 3-minute step tests, finding no difference in outcomes when compared to tests completed in person [6]. In relation to exercise training, video-calling has been utilised to engage children [7] and adults [8,9] in instructor-led training, either through their own clinical team [8] or third-party providers [9]. Moreover, telehealth has been utilised to engage adults with CF in physical activity via a novel website [10]. These studies have, for the most part, been single-group feasibility studies with relatively small numbers of participants ( $n \leq 10$ ) and therefore differences in physical function, fitness, physical activity, and quality of life are either not reported using conventional statistics [7,8], or show no statistically significant differences [10]. The one trial to compare a home-based video-based programme versus an outpatient, hospital-based, pulmonary rehabilitation programme showed no differences in post-trial outcomes between groups, although a small sample size, high withdrawal and heterogeneity in function due to severe disease status makes true effects difficult to establish [9]. Finally, use of video-

calling to deliver exercise sessions has also been reported, but not peer-reviewed [11–14], and therefore findings cannot be confidently utilised.

Whilst these studies have yet to establish a significant benefit to telehealth, encouragingly these studies reveal high acceptance of, and desirability for, telehealth [7,8,10] as well as increased adherence relative to hospital-based regimens (albeit only reported in a singular study [9]). Only a small number of adverse events have been reported, albeit in a group of people with severe lung disease who were listed for transplant [9]. This therefore indicates remote delivery of exercise is indeed feasible and worthy of further consideration. Moreover, initial evidence suggest there may be economic benefits to using virtual exercise classes over face-to-face exercise support in the community, although such data has not been peer-reviewed as yet [13]. Currently, randomised control trials are ongoing to investigate the impact of remote physical activity promotion [15], physiotherapy consultations [16] and activity monitoring [17] upon parameters of fitness and activity, although results have yet to be reported.

Finally, it should be noted that the role of telehealth has been predominantly investigated prior to the global COVID-19 pandemic, and this public health crisis has brought about rapid change in overall acceptability and use of telehealth platforms, in particular the use of video-calling platforms. Initial surveying of clinical teams in the UK suggests that use of telehealth to deliver exercise training will continue as part of standard practice following the pandemic [18]. Therefore, how this modality of healthcare delivery will be adapted and implemented in the future is worthy of consideration by clinical teams. However, long-term viability and acceptability of telehealth is unclear, particularly with the notion of ‘virtual meeting fatigue’ [19], likely induced by rapid and high-volume implementation, induced by the COVID-19 pandemic, and therefore studies should assess how to ensure this promising tool remains viable

for the future. Therefore, this modality is likely to be a complement, rather than a replacement, to continued face-to-face contact with clinical teams.

## REFERENCES

- 1 Shaw DK. Overview of Telehealth and Its Application to Cardiopulmonary Physical Therapy. *Cardiopulmonary Physical Therapy Journal* 2009;**20**:13–8.
- 2 Wood J, Mulrennan S, Hill K, *et al.* Telehealth clinics increase access to care for adults with cystic fibrosis living in rural and remote Western Australia. *Journal of Telemedicine and Telecare* 2017;**23**:673–9. doi:10.1177/1357633X16660646
- 3 Wood J, Jenkins S, Putrino D, *et al.* A smartphone application for reporting symptoms in adults with cystic fibrosis improves the detection of exacerbations: Results of a randomised controlled trial. *Journal of Cystic Fibrosis* Published Online First: 12 September 2019. doi:10.1016/j.jcf.2019.09.002
- 4 Wilkinson OM, Duncan-Skingle F, Pryor JA, *et al.* A feasibility study of home telemedicine for patients with cystic fibrosis awaiting transplantation. *Journal of Telemedicine and Telecare* 2008;**14**:182–5. doi:10.1258/jtt.2008.070107
- 5 Cox NS, Alison JA, Rasekaba T, *et al.* Telehealth in cystic fibrosis: a systematic review. *Journal of Telemedicine and Telecare* 2012;**18**:72–8. doi:10.1258/jtt.2011.110705
- 6 Cox NS, Alison JA, Button BM, *et al.* Assessing exercise capacity using telehealth: a feasibility study in adults with cystic fibrosis. *Respiratory Care* 2013;**58**:286–90. doi:10.4187/respcare.01922
- 7 Chen JJ, Cooper DM, Haddad F, *et al.* Tele-Exercise as a Promising Tool to Promote Exercise in Children With Cystic Fibrosis. *Frontiers in Public Health* 2018;**6**. doi:10.3389/fpubh.2018.00269

- 8 Tomlinson OW, Shelley J, Trott J, *et al.* The feasibility of online video calling to engage patients with cystic fibrosis in exercise training. *Journal of Telemedicine and Telecare* 2020;**26**:356–64. doi:10.1177/1357633X19828630
- 9 Layton AM, Irwin AM, Mihalik EC, *et al.* Telerehabilitation Using Fitness Application in Patients with Severe Cystic Fibrosis Awaiting Lung Transplant: A Pilot Study. *International Journal of Telemedicine and Applications* 2021;**2021**:e6641853. doi:10.1155/2021/6641853
- 10 Cox NS, Alison JA, Button BM, *et al.* Feasibility and acceptability of an internet-based program to promote physical activity in adults with cystic fibrosis. *Respiratory Care* 2015;**60**:422–9. doi:10.4187/respcare.03165
- 11 Hillen B, Pfirrmann D, Simon P, *et al.* P366 A 12-week, individualised, web-based exercise intervention is feasible and effective for people with cystic fibrosis. *Journal of Cystic Fibrosis* 2019;**18**:S161. doi:10.1016/S1569-1993(19)30658-7
- 12 Milligan CM, Pollard K, Watson R, *et al.* P86 Physiotherapist-led online exercise session for people with cystic fibrosis (CF) during the COVID-19 pandemic: a service evaluation. *Thorax* 2021;**76**:A134–A134. doi:10.1136/thorax-2020-BTSabstracts.231
- 13 Johnstone Z, Hyson J. EPS1.04 Audit of virtual exercise class during COVID-19 in children with cystic fibrosis. *Journal of Cystic Fibrosis* 2021;**20**:S30. doi:10.1016/S1569-1993(21)01002-X
- 14 McCrea G, Morrison L, Palmer S. EPS1.08 Exercising online a “Beaming” good initiative. *Journal of Cystic Fibrosis* 2021;**20**:S31. doi:10.1016/S1569-1993(21)01006-7
- 15 Cox NS, Eldridge B, Rawlings S, *et al.* A web-based intervention to promote physical activity in adolescents and young adults with cystic fibrosis: protocol for a randomized controlled trial. *BMC Pulmonary Medicine* 2019;**19**:253. doi:10.1186/s12890-019-0942-3

- 16 Lang RL, Wilson C, Stockton K, *et al.* CyFiT telehealth: protocol for a randomised controlled trial of an online outpatient physiotherapy service for children with cystic fibrosis. *BMC Pulmonary Medicine* 2019;**19**:21. doi:10.1186/s12890-019-0784-z
- 17 Raywood E, Douglas H, Kapoor K, *et al.* Protocol for Project Fizzyo, an analytic longitudinal observational cohort study of physiotherapy for children and young people with cystic fibrosis, with interrupted time-series design. *BMJ Open* 2020;**10**:e039587. doi:10.1136/bmjopen-2020-039587
- 18 Tomlinson OW, Saynor ZL, Stevens D, *et al.* The impact of COVID-19 upon the delivery of exercise services within cystic fibrosis clinics in the United Kingdom. *MedRxiv* Published Online First: 16 April 2021. doi:10.1101/2021.04.12.21255205
- 19 Epstein H-AB. Virtual Meeting Fatigue. *Journal of Hospital Librarianship* 2020;**20**:356–60. doi:10.1080/15323269.2020.1819758



## **5. Clinical Considerations for Activity and Exercise**

### **5.1 Exercise for airway clearance**

Daily performance of airway clearance techniques (ACTs), such as the active cycle of breathing techniques, autogenic drainage and the use of positive expiratory pressure devices, are one of the cornerstones in the management of CF lung disease [1]. There is widespread agreement among people with CF and healthcare professionals that exercise may also improve airway clearance [2] and many people with CF already substitute traditional ACTs with exercise [3]. Whether or not exercise is a satisfactory substitute for traditional ACTs in people with CF has been identified as a top 10 research priority, as deemed by people with CF and healthcare professionals [4]. Adults with CF spend on average nearly one hour per day on ACTs and exercise regimens [5]. If exercise could adequately replace traditional ACTs for people with CF, it may also reduce treatment burden, another of the top 10 research priorities [4].

A recent systematic review, which included 12 studies of 187 children and adults with CF, investigated the effects of moderate intensity exercise for airway clearance compared to no intervention and compared to traditional ACTs [6]. Most studies were conducted when participants were clinically stable, however results were pooled with studies during hospital admissions for exacerbations of lung disease. All except one study were randomised cross-over trials with small sample sizes ( $n \leq 32$ ) and short duration (ranging from a single-session up to two weeks), so there were no data for longer term outcomes, such as exacerbation frequency and quality of life. Due to significant heterogeneity of the exercise and ACTs, however, meta-analyses were limited. Exercise compared to no intervention resulted in positive trends or statistically significant improvements in mucus clearance and expectorated sputum weight [7-9]. When exercise was compared to traditional ACTs, there were distinct differences in efficacy

if the exercise did or did not include a forced expiratory manoeuvre, such as huff or cough. All studies that did not include huff or cough reported significantly less mucus clearance or expectorated sputum weight compared to the traditional ACTs [8, 10-12]. Whereas all studies that did include huff or cough reported no significant difference in mucus clearance or expectorated sputum weight compared to the traditional ACTs [13-17]. This difference may exist because exercise without huff or cough does not create the 10% expiratory airflow bias (i.e.  $PEF:PIF > 1.10$ ) [6] thought to promote cephalad mucus movement [18]. It is likely, however, that some of the studies were underpowered, so the review cannot exclude small differences between exercise and traditional ACTs that may not have been detected. Comparisons were not made according to exercise intensity, type of exercise, clinical stability or severity of lung disease.

The clinical implications are to recommend including huff or cough with exercise if intending to improve airway clearance and that it is possible a single session of exercise (with huff or cough) may have similar effects as traditional ACTs. There is no evidence, however, to answer the question whether or not exercise can act as a substitute for traditional ACTs in the medium or long term, as none of the included studies had a duration of more than two weeks. That highly relevant clinical question will only be answered with a long-term randomised controlled non-inferiority trial comparing exercise to traditional ACTs with meaningful outcomes, such as exacerbation frequency and quality of life. There is interest and good will to investigate this topic, as a recent survey reported 48% of people with CF skip their ACTs if they have exercised and 73% of healthcare professionals would support a trial of this design [2].

## REFERENCES

1. International Physiotherapy Group for Cystic Fibrosis. Physiotherapy for people with cystic fibrosis: From infant to adult, Kerstan M and Maguire I, Editors. 2019; IPG/CF.
2. Rowbotham NJ, Smith SJ, Davies G, Daniels T, Elliott ZC, Gathercole K, Rayner OC, Smyth AR. Can exercise replace airway clearance techniques in cystic fibrosis? A survey of patients and healthcare professionals. *Journal of Cystic Fibrosis* 2020; 19(4): e19-e24.
3. Ward N, Stiller K, Holland AE, and the Australian Cystic Fibrosis Exercise Survey group. Exercise is commonly used as a substitute for traditional airway clearance techniques by adults with cystic fibrosis in australia: A survey. *Journal of Physiotherapy* 2019; 65(1): 43-50.
4. Rowbotham NJ, Smith S, Leighton PA, Rayner OC, Gathercole K, Elliott ZC, Nash EF, Daniels T, Duff AJA, Collins S, Chandran S, Peuple U, Hurley MN, Brownlee K, Smyth AR. The top 10 research priorities in cystic fibrosis developed by a partnership between people with cf and healthcare providers. *Thorax* 2018; 73(4): 388-390.
5. Sawicki GS, Sellers DE, Robinson WM. High treatment burden in adults with cystic fibrosis: Challenges to disease self-management. *Journal of Cystic Fibrosis* 2009; 8(2): 91-96.
6. Ward N, Morrow S, Stiller K, Holland AE. Exercise as a substitute for traditional airway clearance in cystic fibrosis: A systematic review. *Thorax* 2020; epub ahead of print: thoraxjnl-2020-215836.
7. Baldwin DR, Hill AL, Peckham DG, Knox AJ. Effect of addition of exercise to chest physiotherapy on sputum expectoration and lung function in adults with cystic fibrosis. *Respiratory Medicine* 1994; 88(1): 49-53.

8. Dwyer TJ, Daviskas E, Zainuldin R, Verschuer J, Eberl S, Bye PTP, Alison JA. Effects of exercise and airway clearance (positive expiratory pressure) on mucus clearance in cystic fibrosis: A randomised crossover trial. *European Respiratory Journal* 2019; 53(4): 04.
9. Kriemler S, Radtke T, Christen G, Kerstan-Huber M, Hebestreit H. Short-term effect of different physical exercises and physiotherapy combinations on sputum expectoration, oxygen saturation, and lung function in young patients with cystic fibrosis. *Lung* 2016; 194(4): 659-664.
10. Bilton D, Dodd ME, Abbot JV, Webb AK. The benefits of exercise combined with physiotherapy in the treatment of adults with cystic fibrosis. *Respiratory Medicine* 1992; 86(6): 507-511.
11. Falk M, Kelstrup M, Andersen JB, Pedersen SS, Rossing I, Dirksen H. Pep treatment or physical exercise - effects on secretions expectorated and indices of central and peripheral airway function. A controlled study. in 10th International Cystic Fibrosis Congress. 1988. Sydney.
12. Salh W, Bilton D, Dodd M, Webb AK. Effect of exercise and physiotherapy in aiding sputum expectoration in adults with cystic fibrosis. *Thorax* 1989; 44(12): 1006-1008.
13. Aquino A, Balestri E, Dall'Ara S, Lami I, Gobbi F, Ambroni M, Miano A. Efficacy of physical exercise playing a video game for mucus clearance in patients with cystic fibrosis. *Journal of cystic fibrosis* 2006; 5(Suppl 1): S83 A374.
14. Balestri E, Ambroni M, Dall'Ara S. Efficacy of physical exercise for mucus clearance in patients with cystic fibrosis. *Pediatric Pulmonology* 2004; 38(Suppl 27): 316 A368.
15. Cerny FJ. Relative effects of bronchial drainage and exercise for in-hospital care of patients with cystic fibrosis. *Physical Therapy* 1989; 69(8): 633-639.

16. Lannefors L, Wollmer P. Mucus clearance with three chest physiotherapy regimes in cystic fibrosis: A comparison between postural drainage, pep and physical exercise. *European Respiratory Journal* 1992; 5(6): 748-753.
17. Reix P, Aubert F, Werck-Gallois MC, Toutain A, Mazzocchi C, Moreux N, Bellon G, Rabilloud M, Kassai B. Exercise with incorporated expiratory manoeuvres was as effective as breathing techniques for airway clearance in children with cystic fibrosis: A randomised crossover trial. *Journal of Physiotherapy* 2012; 58(4): 241-247.
18. Kim CS, Iglesias AJ, Sackner MA. Mucus clearance by two-phase gas-liquid flow mechanism: Asymmetric periodic flow model. *Journal of Applied Physiology* 1987; 62(3): 959-971.

## 5.2 Modulators

Cystic fibrosis transmembrane regulator (CFTR) modulator therapies target the basic biochemical defect (defective CFTR protein) in CF. Treatments work by correcting CFTR (e.g., Lumacaftor, Tezacaftor, Elexacaftor, VX-121 - Vertex Pharmaceuticals) or potentiating CFTR effects (e.g. Ivacaftor) by allowing CFTR-dependent chloride channels to remain open for longer and enhance chloride transport.

Ivacaftor (Kalydeco<sup>®</sup>) is a CFTR potentiator which increases ‘open probability’ for the CFTR-dependent chloride channel at the cell surface [1]. Kalydeco<sup>®</sup> has been shown to increase FEV<sub>1</sub> by > 10% in people with CF (pwCF) with at least one copy of the G551D mutation [2, 3], with similar lung function benefits for other gating mutations [4]. Case reports suggest Kalydeco<sup>®</sup> positively impact exercise capacity [5, 6], whilst a randomised, double-blind, placebo-controlled, cross-over study (n=20) demonstrated improved exercise duration.[7] In contrast, a phase IV placebo-controlled trial (n=70) of Lumacaftor in combination with Ivacaftor (Orkambi<sup>®</sup>) reported no exercise outcome differences [8].

Elexacaftor, Tezacaftor and Ivacaftor in combination (Trikafta<sup>®</sup> [North America], Kaftrio<sup>®</sup> [Rest of World]) is associated with 10-14% FEV<sub>1</sub> increases, with concomitant improvements in weight and quality of life [9,10]; however to date there is no published evidence showing the effects on exercise capacity or physical activity levels. It is anticipated that the greater stability offered by Kaftrio<sup>®</sup> will improve life expectancy and reduce treatment burden such that withdrawal trials of some existing treatments (e.g. nebulised mucolytics [CF-STORM]) are about to begin. Given that CFTR is expressed in many tissues including muscle and bone, benefits during exercise may be expected and pwCF taking Kaftrio<sup>®</sup> may be more ‘trainable’. A further exercise consideration is that weight gain is reported with all CFTR modulator

therapies, and whilst a beneficial effect for many pwCF, if excessive, may be problematic. The promotion of exercise for a healthy lifestyle in pwCF is, thus as important as ever.

There is, therefore, a unique opportunity to understand the ‘before’ and ‘after’ of exercise physiology (and also exercise behaviours – does being ‘more trainable’ equate to ‘more training’) for pwCF with regard to modulator therapies. Careful consideration needs to be given to the best measurements for such studies (CPET, physical activity monitoring, tests of muscle function), as well as avoiding pitfalls encountered by others e.g. ensuring standardisation of equipment, correcting measures for lean body mass to eliminate weight gain as a confounder, and taking into account the effects of baseline fitness [8]. An attempt should be made to ensure that similar, individualised exercise counselling is given to participants in such studies – standardising their ‘trainability’.

As increasing numbers of pwCF are treated with modulator therapies, we suggest that a standardised, combined approach to collecting clinical data including that from exercise testing within CF registries may represent an important next step in advancing our understanding of how the pathophysiology of CF and new treatments *truly* impact physical function. Furthermore, the study of exercise behaviours will also be invaluable in understanding how health improvements in CF impact time and intensity of physical activity undertaken.

## REFERENCES

1. Van Goor, F., et al., *Rescue of CF airway epithelial cell function in vitro by a CFTR potentiator, VX-770*. Proceedings of the National Academy of Sciences, 2009. **106**(44): p. 18825-18830.

2. Ramsey, B.W., et al., *A CFTR potentiator in patients with cystic fibrosis and the G551D mutation*. New England Journal of Medicine, 2011. **365**(18): p. 1663-1672.
3. Davies, J.C., et al., *Efficacy and safety of ivacaftor in patients aged 6 to 11 years with cystic fibrosis with a G551D mutation*. American journal of respiratory and critical care medicine, 2013. **187**(11): p. 1219-1225.
4. De Boeck, K., et al., *Efficacy and safety of ivacaftor in patients with cystic fibrosis and a non-G551D gating mutation*. Journal of Cystic Fibrosis, 2014. **13**(6): p. 674-680.
5. Saynor, Z.L., et al., *The effect of ivacaftor in adolescents with cystic fibrosis (G551D mutation): an exercise physiology perspective*. Pediatric Physical Therapy, 2014. **26**(4): p. 454-461.
6. Quon, B.S., et al., *Physiological mechanisms of dyspnea relief following ivacaftor in cystic fibrosis: a case report*. Respiratory physiology & neurobiology, 2015. **205**: p. 105-108.
7. Edgeworth, D., et al., *Improvement in exercise duration, lung function and well-being in G551D-cystic fibrosis patients: a double-blind, placebo-controlled, randomized, cross-over study with ivacaftor treatment*. Clinical Science, 2017. **131**(15): p. 2037-2045.
8. Wilson, J., et al., *VO<sub>2</sub>max as an exercise tolerance endpoint in people with cystic fibrosis: Lessons from a lumacaftor/ivacaftor trial*. Journal of Cystic Fibrosis, 2020.
9. Middleton, P.G., et al., *Elexacaftor–tezacaftor–ivacaftor for cystic fibrosis with a single Phe508del allele*. New England Journal of Medicine, 2019. **381**(19): p. 1809-1819.
10. Heijerman, H.G., et al., *Efficacy and safety of the elexacaftor plus tezacaftor plus ivacaftor combination regimen in people with cystic fibrosis homozygous for the F508del mutation: a double-blind, randomised, phase 3 trial*. The Lancet, 2019. **394**(10212): p. 1940-1948.



### **5.3 Risks of Physical Activity and Exercise**

Evidence-based guidelines for physical activity and exercise prescription for people with CF have been published [1] and risks for participating in physical activity and exercise have been described [2] [3]. Reports of serious adverse reactions (SARs) related to exercise in patients with CF have ranged from none [4], [5], [6], [7], to an incidence of less than 1% [8], [9]. SARs of pneumothorax and haemoptysis are associated with risk factors of older age, poor pulmonary function and infections and may occur with exercise [10]. Of note, breath hold during weight training should be avoided. More commonly, mild adverse reactions have been documented during exercise and include muscle fatigue, productive cough, wheezing, shortness of breath and headache [10]–[12] and muscle stiffness [13], as might be expected with exercise.

The risk of developing exercise induced hypoxemia (EIH), where SpO<sub>2</sub> falls below 90%, is higher in patients with CF than in than healthy individuals [8], [14] and is correlated with increased disease severity in CF [15], [16], [17]. As disease progresses, people with CF may require supplementary oxygen to ensure saturation levels are maintained > 90% during exercise [10], [14]. The risk of hypoglycaemia exists for patients with CF-related diabetes mellitus (CFRD) [10]. For these patients, care should be taken to regularly monitor blood sugar levels and develop a pre, during and post-exercise nutrition plan to ensure their levels remain within the acceptable range. It is well recognized that people with CF are at an increased risk of sodium deficiency due to increased sweat production and altered sweat composition [18], which may increase the risk of dehydration and hyponatraemia, particularly during prolonged exercise and/or in warm or hot conditions. Sports drinks may be an appropriate recommendation for people with CF for before, during and after exercise, especially in hot conditions or for longer durations.

There are certain activities that present specific risks for patients with CF, such as exercise at high altitude which may increase the risk of desaturation and right heart failure [19], [20] and scuba diving which may increase the risk of pneumothorax [19]. Furthermore, contact sports should be avoided in patients with advanced lung disease, liver disease, low bone density or a portacath [21]. Finally, cross contamination among patients with CF must be considered in any exercise plan.

While the advantages of physical activity and exercise for most patients with CF far outweigh the risks, there are contraindications which need to be highlighted for patients and their families, especially once disease severity is increased. Since adverse reactions to exercise may occur, individual counselling based on medical history, physical examination and further assessments, including exercise testing, are of high importance [10]. Measures can be then taken to mitigate risks for patients with CF that can ensure that exercise and physical activity remain accessible.

## REFERENCES

- [1] A. Swisher, “Exercise and habitual physical activity for people with cystic fibrosis: Expert consensus. Evidence-based guide for advising patients,” *Cardiopulm Phys Ther J*, vol. 26, no. 4, pp. 85–98, 2015.
- [2] T. Radtke, S. J. Nevitt, H. Hebestreit, and S. Kriemler, “Physical exercise training for cystic fibrosis,” *Cochrane Database Syst. Rev.*, Nov. 2017, doi: 10.1002/14651858.CD002768.pub4.
- [3] Cystic Fibrosis Trust, “Standards of Care and Good Clinical Practice for the Physiotherapy Management of Cystic Fibrosis (2020) Fourth edition - November 2020, Consensus Document.” 2020. [Online]. Available: <https://bit.ly/3gfT9zN>

- [4] N. Beaudoin, G. F. Bouvet, A. Coriati, R. Rabasa-Lhoret, and Y. Berthiaume, "Combined Exercise Training Improves Glycemic Control in Adult with Cystic Fibrosis," *Med. Sci. Sports Exerc.*, vol. 49, no. 2, pp. 231–237, Feb. 2017, doi: 10.1249/MSS.0000000000001104.
- [5] S. Kriemler *et al.*, "Effect of supervised training on FEV1 in cystic fibrosis: A randomised controlled trial," *J. Cyst. Fibros.*, vol. 12, no. 6, pp. 714–720, Dec. 2013, doi: 10.1016/j.jcf.2013.03.003.
- [6] E. S. Sosa *et al.*, "Intrahospital Weight and Aerobic Training in Children with Cystic Fibrosis: A Randomized Controlled Trial," *Med. Sci. Sports Exerc.*, vol. 44, no. 1, pp. 2–11, Jan. 2012, doi: 10.1249/MSS.0b013e3182228c302.
- [7] E. Santana-Sosa *et al.*, "Benefits of combining inspiratory muscle with 'whole muscle' training in children with cystic fibrosis: a randomised controlled trial," *Br. J. Sports Med.*, vol. 48, no. 20, pp. 1513–1517, Oct. 2014, doi: 10.1136/bjsports-2012-091892.
- [8] S. Rand and S. A. Prasad, "Exercise as part of a cystic fibrosis therapeutic routine," *Expert Rev. Respir. Med.*, vol. 6, no. 3, pp. 341–352, Jun. 2012, doi: 10.1586/ers.12.19.
- [9] K. Ruf, B. Winkler, A. Hebestreit, W. Gruber, and H. Hebestreit, "Risks associated with exercise testing and sports participation in cystic fibrosis," *J. Cyst. Fibros.*, vol. 9, no. 5, pp. 339–345, Sep. 2010, doi: 10.1016/j.jcf.2010.05.006.
- [10] C. Burtin and H. Hebestreit, "Rehabilitation in Patients with Chronic Respiratory Disease Other than Chronic Obstructive Pulmonary Disease: Exercise and Physical Activity Interventions in Cystic Fibrosis and Non-Cystic Fibrosis Bronchiectasis," *Respiration*, vol. 89, no. 3, pp. 181–189, 2015, doi: 10.1159/000375170.

- [11] A. M. Layton *et al.*, “Telerehabilitation Using Fitness Application in Patients with Severe Cystic Fibrosis Awaiting Lung Transplant: A Pilot Study,” *Int. J. Telemed. Appl.*, vol. 2021, pp. 1–7, Feb. 2021, doi: 10.1155/2021/6641853.
- [12] S. Denford, S. van Beurden, P. O’Halloran, and C. A. Williams, “Barriers and facilitators to physical activity among children, adolescents, and young adults with cystic fibrosis: a systematic review and thematic synthesis of qualitative research,” *BMJ Open*, vol. 10, no. 2, p. e035261, Feb. 2020, doi: 10.1136/bmjopen-2019-035261.
- [13] T. del Corral, M. À. Cebrià i Iranzo, I. López-de-Uralde-Villanueva, R. Martínez-Alejos, I. Blanco, and J. Vilaró, “Effectiveness of a Home-Based Active Video Game Programme in Young Cystic Fibrosis Patients,” *Respiration*, vol. 95, no. 2, pp. 87–97, 2018, doi: 10.1159/000481264.
- [14] J. R. Yankaskas, B. C. Marshall, B. Sufian, R. H. Simon, and D. Rodman, “Cystic Fibrosis Adult Care,” *Chest*, vol. 125, no. 1, pp. 1S–39S, Jan. 2004, doi: 10.1378/chest.125.1\_suppl.1S.
- [15] D. T. Ryujin, S. C. Mannebach, W. M. Samuelson, and B. C. Marshall, “Oxygen saturation in adult cystic fibrosis patients during exercise at high altitude,” *Pediatr. Pulmonol.*, vol. 32, no. 6, pp. 437–441, Dec. 2001, doi: 10.1002/ppul.1155.
- [16] K. G. Henke and D. M. Orenstein, “Oxygen Saturation during Exercise in Cystic Fibrosis<sup>1–3</sup>,” *Am. Rev. Respir. Dis.*, vol. 129, no. 5, pp. 708–711, May 1984, doi: 10.1164/arrd.1984.129.5.708.
- [17] K. Ruf and H. Hebestreit, “Exercise-induced hypoxemia and cardiac arrhythmia in cystic fibrosis,” *J. Cyst. Fibros.*, vol. 8, no. 2, pp. 83–90, Mar. 2009, doi: 10.1016/j.jcf.2008.09.008.

- [18] D. M. Orenstein, K. G. Henke, D. L. Costill, C. F. Doershuk, P. J. Lemon, and R. C. Stern, “Exercise and Heat Stress in Cystic Fibrosis Patients,” *Pediatr. Res.*, vol. 17, no. 4, pp. 267–269, Apr. 1983, doi: 10.1203/00006450-198304000-00007.
- [19] A. K. Webb and M. E. Dodd, “Exercise and sport in cystic fibrosis: benefits and risks,” *Br. J. Sports Med.*, vol. 33, no. 2, pp. 77–78, Apr. 1999.
- [20] M. E. Speechly-Dick, S. J. Rimmer, and M. E. Hodson, “Exacerbations of cystic fibrosis after holidays at high altitude — a cautionary tale,” *Respir. Med.*, vol. 86, no. 1, pp. 55–56, Jan. 1992, doi: 10.1016/S0954-6111(06)80150-2.
- [21] M. S. Putman, A. Anabtawi, T. Le, V. Tangpricha, and I. Sermet-Gaudelus, “Cystic fibrosis bone disease treatment: Current knowledge and future directions,” *J. Cyst. Fibros.*, vol. 18, pp. S56–S65, Oct. 2019, doi: 10.1016/j.jcf.2019.08.017.

**Acknowledgements:** Thanks to Evyatar Frank and Kristina Kaganovich (MFSc students) for helping with the literature review.

## **5.4 Nutrition and Hydration**

Maintaining an active lifestyle in Cystic Fibrosis is crucial for all patients (1) in order to optimise quality of life and best prognosis (2). Since CF patients are susceptible to electrolyte dysregulation and dehydration which are potentially exacerbated during intense physical activity, a series of concerns should be addressed to accomplish the best exercise results.

Nutrition in Cystic Fibrosis also plays a vital role in the health of patients. High energy, high fat intake diet along with pancreatic replacement therapy (PERT) -if pancreatic inefficiency is present- remains the cornerstone of adequate CF care (3). As CF individuals have been found to present less energy cost of daily activities (ECA) (4) and also tend to show decreased exercise capacity if undernourished (5), a nutritional program oriented in providing the energy required is essential. In this direction, all CF patients should be educated about their nutritional status and caloric needs to achieve maximal adherence (6). A high-calorie, high-fat, well-balanced meal two to three hours before rigorous activity should be encouraged, along with a small carbohydrate snack about sixty minutes before exercise. At least two hours after physical activity, a full meal rich in carbohydrates should be acquired to replenish energy balance, while at all times, proper adherence to PERT should always be kept in mind (7). Every exercise/diet plan should be discussed with the physician and dietician to meet the CF individual's BMI targets, caloric goals, and diet preferences.

Individuals with CF-related diabetes (CFRD) should also be encouraged to adopt a daily physical activity program to improve their exercise capacity and lung function(8, 9). It is advised that all CFRD individuals should obtain blood glucose measurements before and after exercise to avoid post-exercise hypoglycaemia (10, 11). Possible nutritional strategies to avoid exercise-induced hypoglycaemia are considered a pre -exercise snack, proper insulin

adjustment for the meals pre/post exercise along with the addition of a snack before bedtime. However, every nutritional strategy in the CFRD patients should be individualized to meet the patient's glycaemic goals (12).

Avoidance of electrolyte dysregulation during exercise and maintaining proper hydration poses a challenge for CF individuals. All patients should commence exercise fully hydrated. If physical activity is of low intensity and lasts less than 30 minutes, adequate water intake would be enough for replacing the fluid loss. However, for higher intensity, longer-lasting physical activities (requiring heart rates >120-140bpm for more than 30 minutes), or when performing under excess heat conditions, additional salt supplementation should be encouraged (13). Isotonic drinks are well absorbed and can be used to replace water (14, 15). CF individuals should always be cautious for early signs of dehydration during physical activity (sore mouth, dizziness, headaches).

## **REFERENCES**

1. Wheatley CM, Wilkins BW, Snyder EM. Exercise is medicine in cystic fibrosis. *Exercise and sport sciences reviews*. 2011;39(3):155-60. doi: 10.1097/JES.0b013e3182172a5a
2. Hebestreit H, Hulzebos EHJ, Schneiderman JE, Karila C, Boas SR, Kriemler S, et al. Cardiopulmonary Exercise Testing Provides Additional Prognostic Information in Cystic Fibrosis. *American journal of respiratory and critical care medicine*. 2019;199(8):987-95. doi: 10.1164/rccm.201806-1110OC
3. Turck D, Braegger CP, Colombo C, Declercq D, Morton A, Pancheva R, et al. ESPEN-ESPGHAN-ECFS guidelines on nutrition care for infants, children, and adults with cystic fibrosis. *Clinical nutrition (Edinburgh, Scotland)*. 2016;35(3):557-77. doi: 10.1016/j.clnu.2016.03.004

4. Johnson MR, Ferkol TW, Shepherd RW. Energy cost of activity and exercise in children and adolescents with cystic fibrosis. *Journal of cystic fibrosis : official journal of the European Cystic Fibrosis Society*. 2006;5(1):53-8. doi: 10.1016/j.jcf.2005.10.001
5. Marcotte JE, Canny GJ, Grisdale R, Desmond K, Corey M, Zinman R, et al. Effects of nutritional status on exercise performance in advanced cystic fibrosis. *Chest*. 1986;90(3):375-9. doi: 10.1378/chest.90.3.375
6. Calvo-Lerma J, Hulst JM, Asseiceira I, Claes I, Garriga M, Colombo C, et al. Nutritional status, nutrient intake and use of enzyme supplements in paediatric patients with Cystic Fibrosis; a European multicentre study with reference to current guidelines. *Journal of cystic fibrosis : official journal of the European Cystic Fibrosis Society*. 2017;16(4):510-8. doi: 10.1016/j.jcf.2017.03.005
7. Foundation. CF. Nutritional Basics. [Available from: <https://www.cff.org/Life-With-CF/Daily-Life/Fitness-and-Nutrition/Nutrition/Getting-Your-Nutrients/Nutritional-Basics>.
8. Causer AJ, Shute JK, Cummings MH, Shepherd AI, Wallbanks SR, Allenby MI, et al. The implications of dysglycaemia on aerobic exercise and ventilatory function in cystic fibrosis. *Journal of cystic fibrosis : official journal of the European Cystic Fibrosis Society*. 2020;19(3):427-33. doi: 10.1016/j.jcf.2019.09.014
9. Foster K, Huang G, Zhang N, Crisalli J, Chini B, Amin R, et al. Relationship between exercise capacity and glucose tolerance in cystic fibrosis. *Pediatric pulmonology*. 2018;53(2):154-61. doi: 10.1002/ppul.23906
10. Tran BD, Galassetti P. Exercise in pediatric type 1 diabetes. *Pediatric exercise science*. 2014;26(4):375-83. doi: 10.1123/pes.2014-0066
11. Adolfsson P, Riddell MC, Taplin CE, Davis EA, Fournier PA, Annan F, et al. ISPAD Clinical Practice Consensus Guidelines 2018: Exercise in children and adolescents with diabetes. *Pediatric diabetes*. 2018;19 Suppl 27:205-26. doi: 10.1111/pedi.12755



12. Moheet A, Chan CL, Granados A, Ode KL, Moran A, Battezzati A. Hypoglycemia in cystic fibrosis: Prevalence, impact and treatment. *Journal of cystic fibrosis : official journal of the European Cystic Fibrosis Society*. 2019;18 Suppl 2:S19-s24. doi: 10.1016/j.jcf.2019.08.004
13. Lewis DP, Hoffman MD, Stuempfle KJ, Owen BE, Rogers IR, Verbalis JG, et al. The need for salt: does a relationship exist between cystic fibrosis and exercise-associated hyponatremia? *Journal of strength and conditioning research*. 2014;28(3):807-13. doi: 10.1519/JSC.0b013e3182a35dbd
14. UK CFDG. Staying hydrated and cystic fibrosis 2019 [Available from: <https://www.cysticfibrosis.org.uk/sites/default/files/2020-12/Staying%20hydrated%20and%20cystic%20fibrosis%20July%202019.pdf>].
15. Rodriguez NR, Di Marco NM, Langley S. American College of Sports Medicine position stand. Nutrition and athletic performance. *Medicine and science in sports and exercise*. 2009;41(3):709-31. doi: 10.1249/MSS.0b013e31890eb86
