# Supplementary material for: The Exeter Activity Unlimited statement on physical activity and exercise for cystic fibrosis: methodology and results of an international, multidisciplinary, evidence-driven expert consensus
Source: PubMed Central journal article supplement — Chron Respir Dis. 2022 Sep 6;19:14799731221121670. doi: 10.1177/14799731221121670 (PMC9459449; doi:10.1177/14799731221121670), 2022-09-06
Supplement: sj-pdf-3-crd-10.1177_14799731221121670.pdf [file sj-pdf-3-crd-10.1177_14799731221121670.pdf]

**Supplementary File 3.** Excluded consensus statements, with associated levels of (dis)agreement.

| <b>Statement</b>                                                                                                                                                                                                                                                                                                          | <b>Agree<br/><i>n</i> (%)</b> | <b>Do Not Agree<br/><i>n</i> (%)</b> | <b>Abstain<br/><i>n</i> (%)</b> |
|---------------------------------------------------------------------------------------------------------------------------------------------------------------------------------------------------------------------------------------------------------------------------------------------------------------------------|-------------------------------|--------------------------------------|---------------------------------|
| <b>Health Benefits of Physical Activity and Exercise in CF – How does changing these factors benefit people with cystic fibrosis?</b>                                                                                                                                                                                     |                               |                                      |                                 |
| 1 Physical activity and exercise can slow the rate of decline of lung function in people with cystic fibrosis.                                                                                                                                                                                                            | 26 (68)                       | 8 (21)                               | 4 (11)                          |
| 2 Improved glycaemic control with low incidence of risks such as hypoglycaemic events may be achieved, by people with cystic fibrosis-related dysglycaemia, by participating in moderate intensity activity or exercise.                                                                                                  | 25 (66)                       | 6 (16)                               | 7 (18)                          |
| 3 Exercise interventions may modulate inflammation associated with muscle insulin sensitivity and bacterial infection.                                                                                                                                                                                                    | 25 (66)                       | 3 (8)                                | 10 (26)                         |
| 4 There is currently very little evidence for the impact of physical activity or exercise on mental wellbeing, depression, and anxiety among people with cystic fibrosis; however, studies exploring the issue are generally low quality.                                                                                 | 26 (68)                       | 5 (13)                               | 7 (18)                          |
| <b>Clinical Considerations for Physical Activity and Exercise in CF – What must we also consider when prescribing activity and exercise for people with cystic fibrosis?</b>                                                                                                                                              |                               |                                      |                                 |
| 5 A high-calorie, high-fat, well-balanced meal two to three hours before rigorous activity should be encouraged, along with a small carbohydrate snack about sixty minutes before exercise. At least two hours after physical activity, a full meal rich in carbohydrates should be acquired to replenish energy balance. | 19 (50)                       | 8 (21)                               | 11 (29)                         |
| <b>Future Directions for Physical Activity and Exercise in CF</b>                                                                                                                                                                                                                                                         |                               |                                      |                                 |
| 6 Future research should examine:                                                                                                                                                                                                                                                                                         |                               |                                      |                                 |
| a. Whether certain exercise modalities and/or intensities have beneficial effects upon physical and mental health.                                                                                                                                                                                                        | a) 28 (74)                    |                                      |                                 |
